# Supplementary material
Source: PubMed Central journal article supplement (PMC6488028)
Supplement: NIHMS1512665-supplement-1.pdf [file NIHMS1512665-supplement-1.pdf]

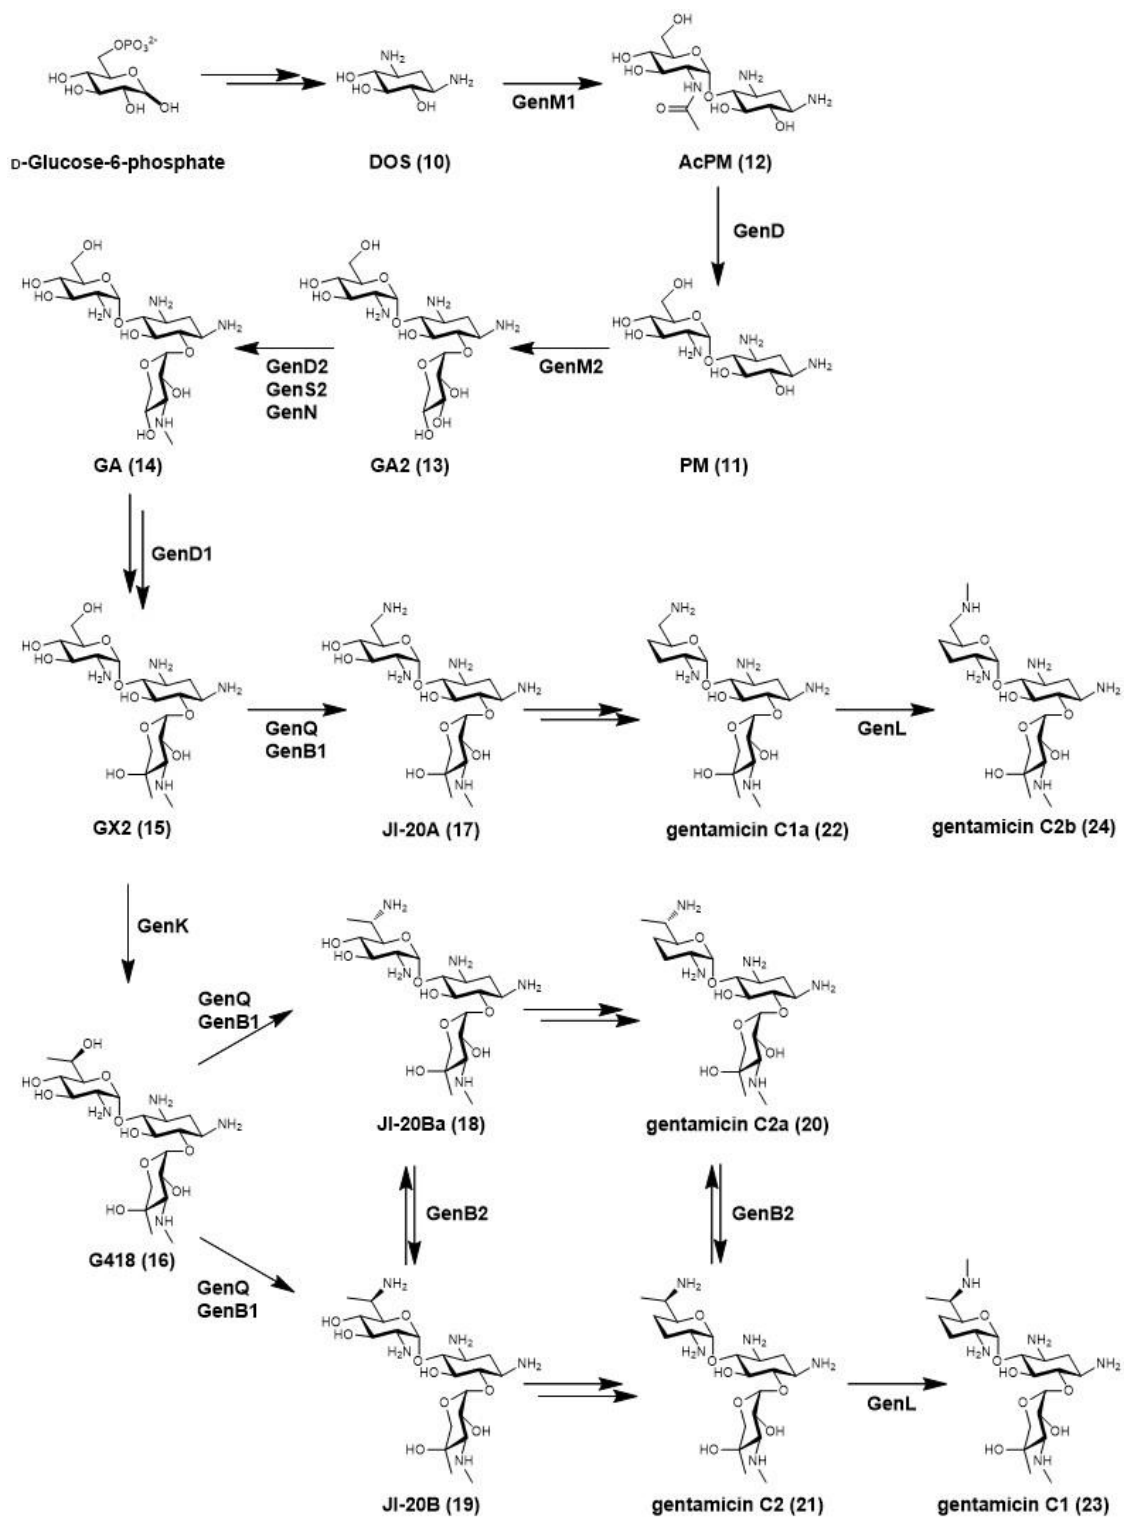

Supplementary Figure 1. The previously known biosynthetic pathway of gentamicin.

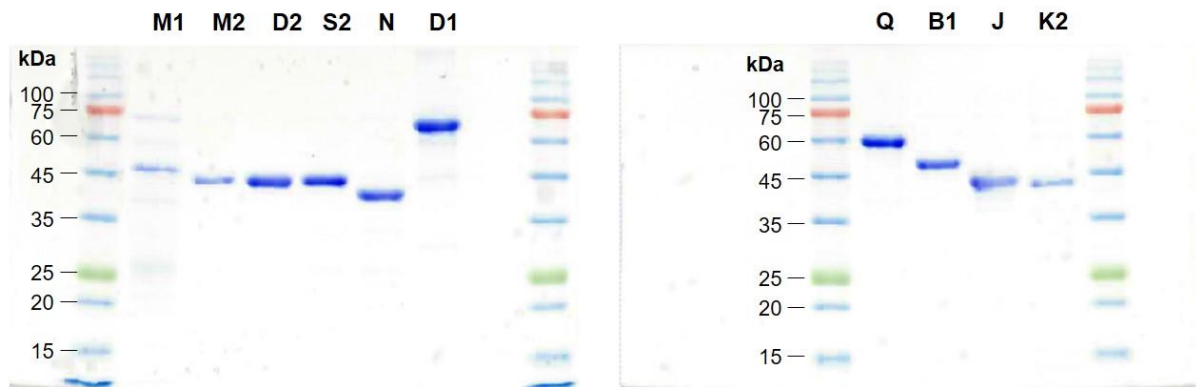

**Supplementary Figure 2. SDS-PAGE of purified gentamicin biosynthetic enzymes.** Gel is representative example of  $n > 5$  independent experiments.

```

*           20           *           40           *           60           *           80
GenJ   : --MKPASGGRDPLRFRSIPPTRLRPRRTPTPTTPTVTVNTGGGSAQPREMWGEVMSGGHHSIFVEPHRSADGARRLTEDQL : 78
KanJ   : --MALAA-----PPGELTLALTP-----DDKTLDPASL : 26
FtmCox1 : -----MTVDSKF-----QLQRLAADADV : 18
PtlH   : -----MTNVTGD-----YTDCTPLLGDR : 18
PAHX   : MEQLRAAARLQIVLGHGLGRPSAGAVVAHPTSG-----TISSASFHPQQFQYTLDDNNVLT : 54

*           100          *           120          *           140          *           160
GenJ   : DHARSLLRVEGAVILPGIVPAELVARLRDMLADLAR----REHPLPTNFVVTGHIQQDF--PPVPELLFP-----EVL : 145
KanJ   : DRALAIALEHGILVLTGMLRTRLTDQLRTAMLDDLPEV-L-RQQDVPTNFVPGHVQQDF--PVRESLLFP-----DVL : 95
FtmCox1 : DRMCRLLEEDGAFILKGLLPFDVVESFNRELDVQMAIP-PPKGERLLADKYPPHFKYVFNVAATTCPTFRN-----TVL : 90
PtlH   : AALDSFYEEHGYLFLRNVLDRDLVKTVAEQMREGLVALGAADPHATLEELTIDSFESVDEVAMHDYVKYD-----AFW : 91
PAHX   : LEQRKFYEENGFLVIKNLVDPADIQRFRNEFEKICRKEVKPLGLTVMRDVITISKSEYAPSEKMITKVQDFQEDKELFRYC : 134
          G   6   66

*           180          *           200          *           220          *           240
GenJ   : LNESVYRVTTALLGPDAKNAVYSGNINLPGS--LEQPVHLDEG---HLWPGPTEHPAYALEVDIPLIDFTVHNGSTEYWL : 220
KanJ   : LNFVYQITHAVLGADARNAVYSGNMLPGS--HEQPVHLDEP---HLWPG-ISHPYCLCVDVPLIDFTLENGSTEYWP : 169
FtmCox1 : INPVIHAICEAYFQRTGDYWLAAFLREIESGMPAQPFHRDDATHPLMHYQPLEAPPVSLSVIFPLTEFTEENGATEVIL : 170
PtlH   : NNPSTIKVFEQVFGEPVVFVFLSTIRIYVPSQAGSEEPSFHLYLTF-FHQDGFYIGPNQDFRTFWIPLIRTTRESGGVALAD : 170
PAHX   : TLPFELKYVECFTPGNIMAMHTMLINKPPDSGKKTSRHPLHQD----LHYFFFRPSDLIVCAWTAMEHISRNGCLVLP : 210
          G   6   3   G

*           260          *           280          *           300          *           320
GenJ   : GTHQLNPEGWYDDSGRVETAALQRRRAVRPPQQAFAIPAGSAVIRDARLWHRGTVNHSSSPR-PMVAMTHYCDWFETPPIV : 299
KanJ   : GSHVLNPECYDERGCVLPAELEERRRAVAPPVRFPIPVGSVVIRDGLWHRGVNLSAAPR-PLLAMTHYTEWFDMPPIQ : 248
FtmCox1 : GSHRWTEVGTP-ERDQAVLATMDFGDVLIIVRQRVVHAGGGNRTTAGKPRRVVLAYFNSVQLTPPFETYRTMPREMVESMTV : 249
PtlH   : GSHRRGKRDHVLNESFRFRFGHPVVRGIPPEVSEDEHLLHSPMEFGDILLFHAMCHKSIPI--LSKDPRLMRMSMDTRVQ : 248
PAHX   : GTHRGSLKPHDYPKWEGGVNKMFGH--IQDYEENKARVHLVMEKGDVTFVFFHPLLIHGSGQN-KTQGFKAISCHFASADC : 287
          G3H

*           340          *           360          *
GenJ   : LPSAVRPWIESSPYRTSATFTDEPIDHLTSEHAFAIQ----- : 336
KanJ   : LPDTPVKSVDGSDRHTAHFVAGDVDHLTGDHDFAVR----- : 285
FtmCox1 : LGQRMLGWRTMKPSDPNIVGIN-LIDDKRLENVLQLKAADSPA----- : 291
PtlH   : PAKSHRFGFNAMTPWTESAKDASKGIMAKITGTPDVE----- : 285
PAHX   : HYIDVKGTSQENIEKEVVGIAHKFFGAENSVNLKDIWMFRARLVKGERTNL : 338
          G

```

**Supplementary Figure 3. Sequence alignment of GenJ with homologous other  $\alpha$ -ketoglutarate dependent non-heme iron dioxygenases from *Streptomyces kanamyceticus* (KanJ: GenBank accession no. Q6L732), *Aspergillus fumigatus* (Ftm0x1: Q4WAW9.1), *Streptomyces avermitilis* (PtlH: BAC70702.2), *Homo sapiens* (PAHX: NP\_006205.1). Multiple alignment of each sequence was carried out by clustalX. The highly conserved residues are represented in yellow boxes and Fe(II)-dependent binding motif HXD...H was marked in red.**

```

          *           20           *           40           *           60           *           80
GenK2      : -----MPSRSNERRSFPGGRTRPAGDRADAERKSLVKTLLVGGTGTVPGPVVRGLVDAGHDVVVAHR----GE : 63
KanK       : -----MSSQLALRGP-----ELSANLCKFE-EDTLRLVLTGGSGNVGVGVVRRALNAARHHVVVASR----GY : 57
Tter_1570  : -----MRVLVVGGTGNISTGVIKYLLEFGHDVTVFNR----GV : 34
ANT_08180  : MRFVVRKMFVFSRHLCKKYARMDISYSQWLKSFYFWRDTRMVKVGVGGSGNISTSIIVRLVSLGHEVYCFNR----GK : 76
SSEG_08028 : -----MRVVVIGGSGHIGTFLVPRLLVRAGHEVINISRGRSRTAY : 38
          64v V GG3G 6 66 L gH V R g

          *           100          *           120          *           140          *           160
GenK2      : TVAELPVGVSVARVDRHLDG---ALAEVSTVRPDAVVDLTCDDADDGRLTVDACRGVD-RLLVSSVNAAG-GPLPTPV : 138
KanK       : SPALLPEGVRAVRLERTEPD---AYTRLVAAEKPDVIDLTCDDAADAATLRLACAGVD-RVVVSSVTAAG-PATTFPV : 132
Tter_1570  : TKRPLPKVEKVIHGRDRHDLN---TFEKTMQENKFDAIDMICYPEEAESDLRAFRDVK-HFIHVSTVAVFGGEPAEYPI : 110
ANT_08180  : S-RPVPEGAKTLTGRDNDRE---TFEKMMSYHFDAIDMMCFTREDAESSVRAFRGVS-HFVQCSTVCTYGDIDYDNLV : 151
SSEG_08028 : AEAPFWHHVRQVVAADREQEDREGTFGRVARLEPDAVIDLVCFTLDSATALVERLRGEAGHLVHCGSVWRHG-PADKLP : 117
          p v dR 6 DA 6D 6 C a 6 a r g v 6 s3V G P6

          *           180          *           200          *           220          *           240
GenK2      : HERVTPAPVSDYGRDKLGLAQAVRDSWTTGDSRALVVRVLPVYRPGSGLDGQLA-EDTYWLGQALAGEPAVLADGGERYW : 217
KanK       : TEATAAPLSEYGIKLAVEETVRAAWADGTSQALLVRLGAVYRLGADLDGQLA-EDGCWLAHAAAGAPAVLADDGAARW : 211
Tter_1570  : NENTRRNPVIEYSRNKVAADNVFMNAYKEYGFPVTFIMPAQTWGYQDGIQRQLG-GGNIWIDRVRKGLPILVTHEGNLIW : 189
ANT_08180  : TEDHPLRPITPYGRGKVEADHVLEAYHREGFPVTIIPKSTTYGPIMLPRQIA-WDFSWIDRTRKGPVIVCGDGNALH : 230
SSEG_08028 : SEATGTPPVGYGIQKDRIRMLKEETASGGVLVTTSLHPGHIVGPGWHPGIPGLSLDPAVWYTLGAGQSLKVPVSGSVELM : 197
          E P6 Yg K q6 d w G p 6 G

          *           260          *           280          *           300          *           320
GenK2      : NLLHAEDAGRAFAALLAN-FAAERELVLVARRRPIRWRDLVYRTVHSGLGLSTRVTSAPAQLVLEQLSDDEWLQETS-LWD : 295
KanK       : NLLHADDAGAALAEALLAN-DRARGVLVHLASRHLPLWRRELYRVHHAALGRFPFVSVPAEWAAEQLEDAEFLAETS-RWD : 289
Tter_1570  : AHCHSDDVGLGIAAAVGR-ERCIGESYIITRWDMMKTWRDYHEEIAWSLQKANLVDAPAEILLIKVWPEGTWLLASESRWN : 268
ANT_08180  : QFLHVDAAAPAFVYVLR-ERCLGQVYNMVARGFRTWAEFHRTAAKVFGEIELVGIPIFADLKRNVPEFGICEEIFAHH : 309
SSEG_08028 : HHVHADDVAQAFAFERAVEHRDAAAGEDFTIVAPTALNVRGYARIAAGWFGRTASLEPVTWEEFRSITAPEHAEASWEHLHR : 277
          H dD a 6 g 6 wr G v p

          *           340          *           360          *           380
GenK2      : QVYDLSLLDRILAPDYQELAGDKD-LVATAAWLVDQGETGDPFELIAEISGLGRAWAARDGSS--- : 355
KanK       : QVFDLGLLDRILAPSYQERGGPSR-VTEVALWLIRQGRVGDALGAEIQELPARLAAVRTAPGLV : 352
Tter_1570  : RIYSLDKIRRDIPFNPRITLADWMPDYVRDLIDARGLIPDARSDDTDRIRNLRMISNFNC- : 331
ANT_08180  : VIYSAEKLFRDVPEFQPRIRLEEGMAQVFEAMEREGRIPNSDALKWEDDIIARWKKIYQ----- : 368
SSEG_08028 : SQCLTIEKARTLLGYAPRYEPEAAVLESVRWLIGHEELKPAGPLVV----- : 323
          R p 5 r 6 6 g

```

**Supplementary Figure 4. Sequence alignment of GenK2 with homologous other NAD/NADP dependent dehydrogenases/reductases from *S. kanamyceticus* (KanK: GenBank accession no. Q2MFU6), *Thermobaculum terenum* ATCC BAA-198 (Tter\_1570: ACZ42476), *Anaerolinea thermophile* UNI-1 (ANT\_08180: BAJ62852), *Streptomyces sviceps* ATCC 29083 (SSEG\_08028: EDY61449). Rossmann fold GGXGXXG NAD/NADP binding motif was conserved in yellow boxes.**

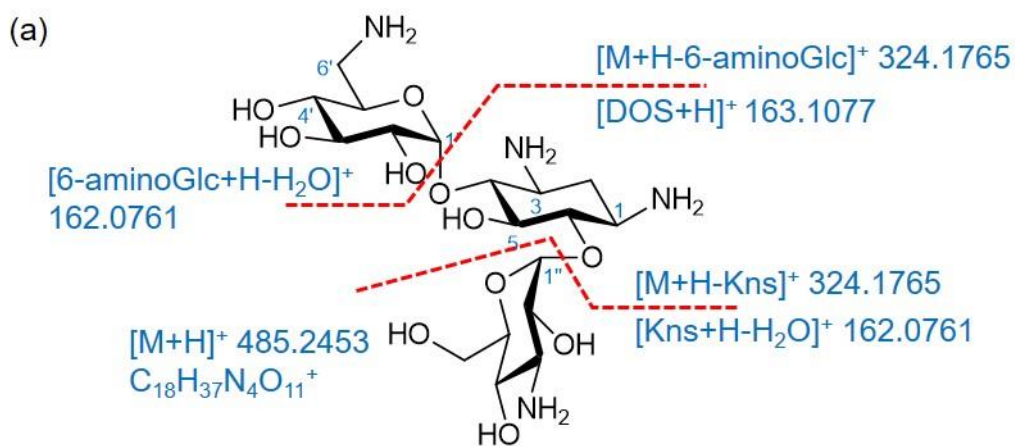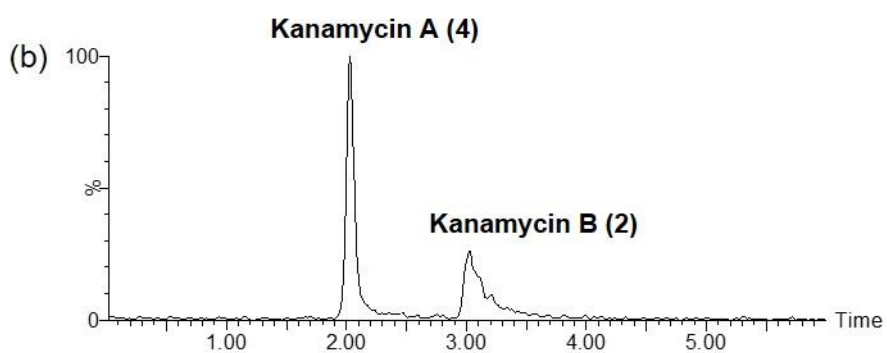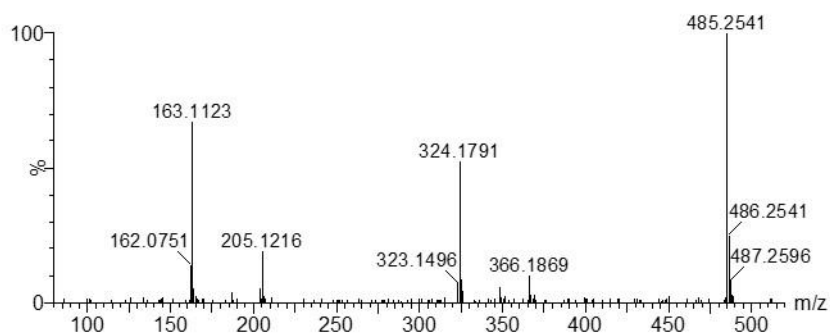

**Supplementary Figure 5. GenJ-GenK2 reaction with kanamycin B (2).** (a) MS/MS fragmentation pattern of kanamycin A (4). (b) The UPLC-qTOF-HR-MS chromatogram selected for  $m/z = 485.2453$  and MS/MS spectra of enzymatically synthesized kanamycin A. The UPLC chromatogram and MS spectrum shown are representative examples of  $n > 5$  independent experiments.

(a)

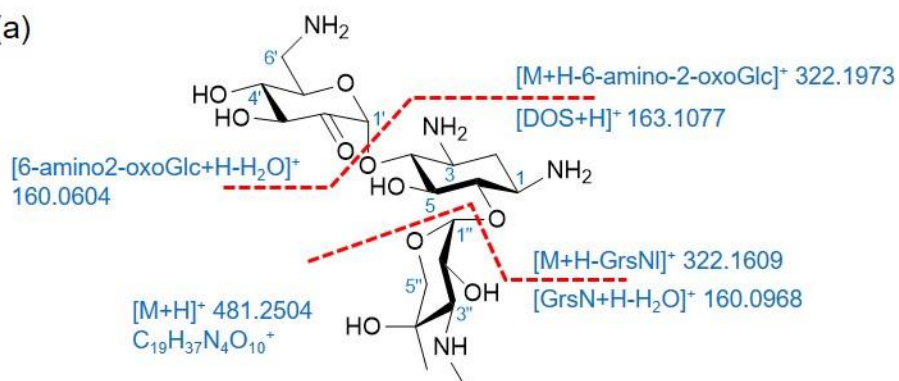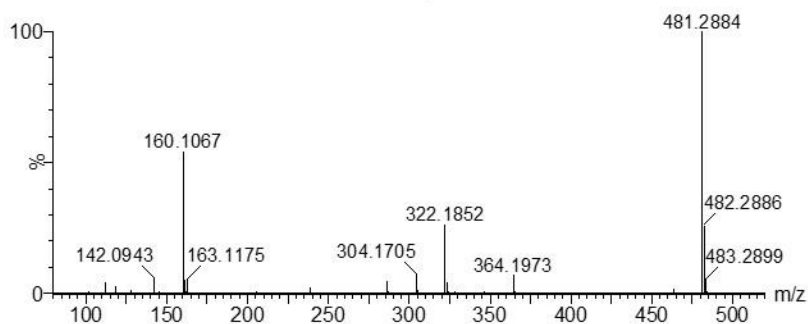

(b)

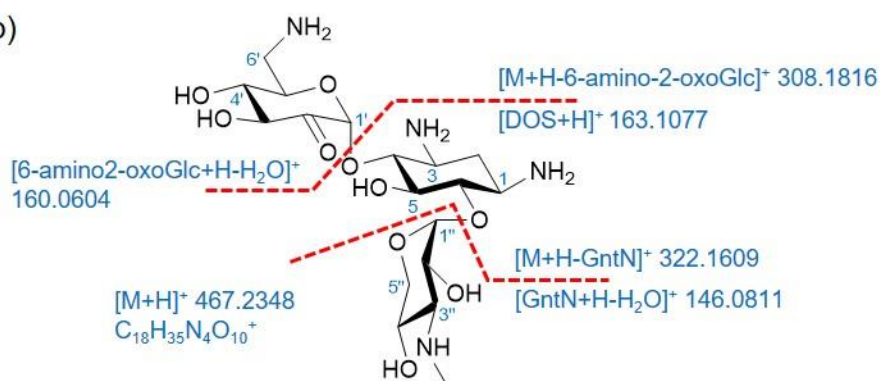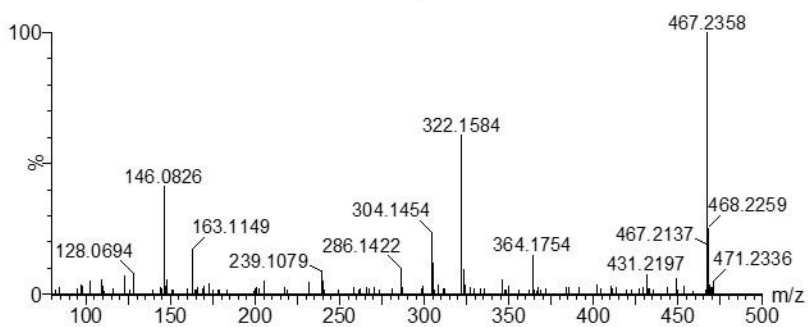

(c)

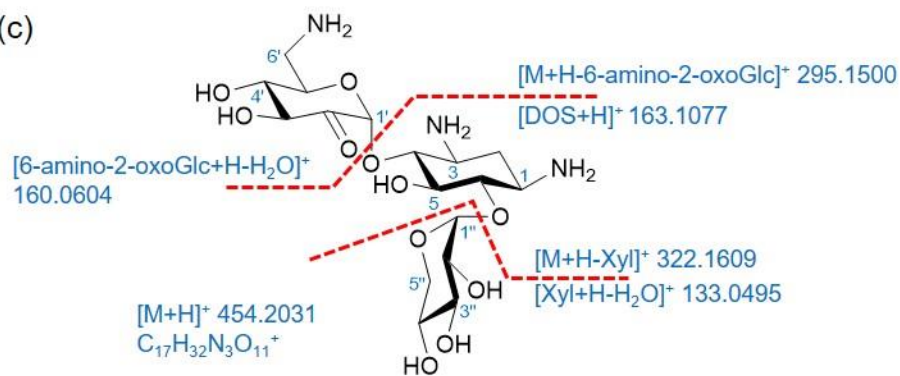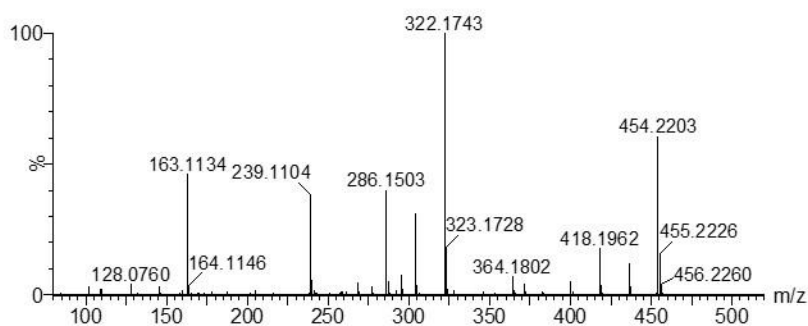

(d)

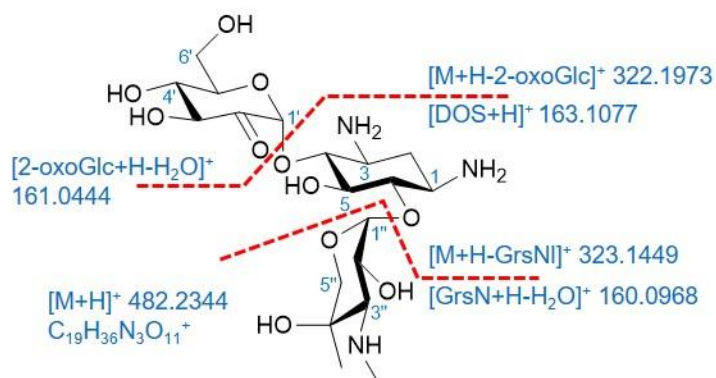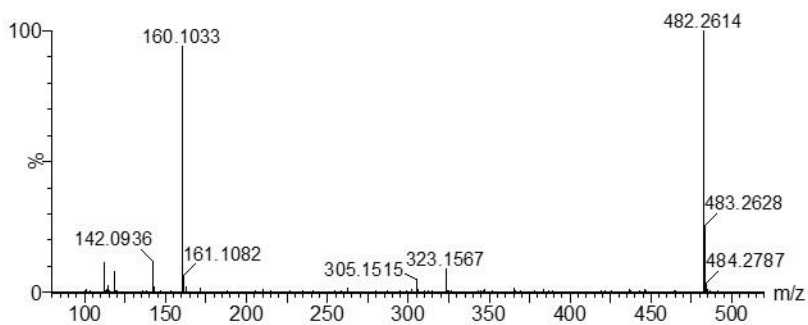

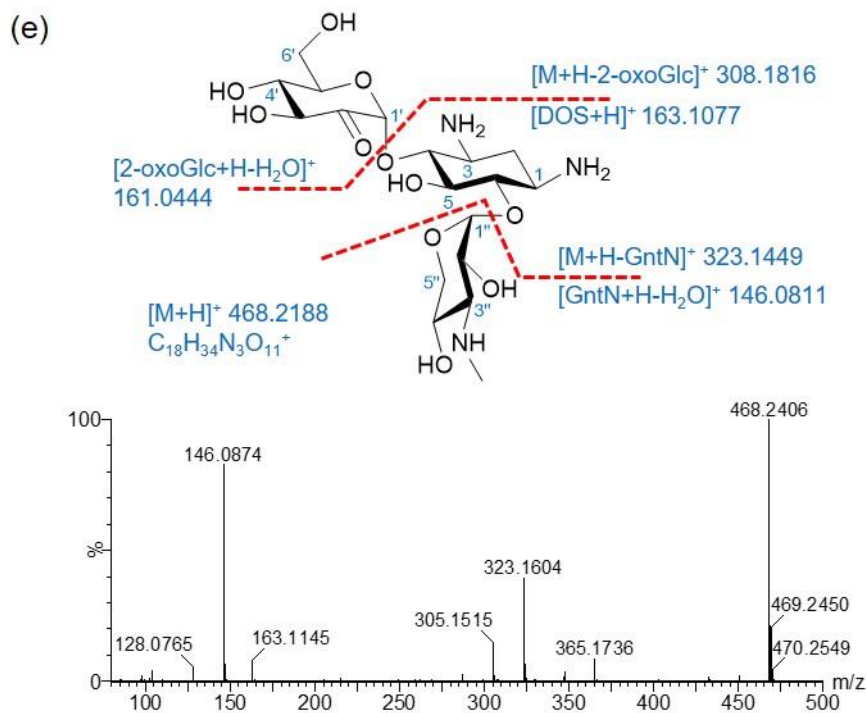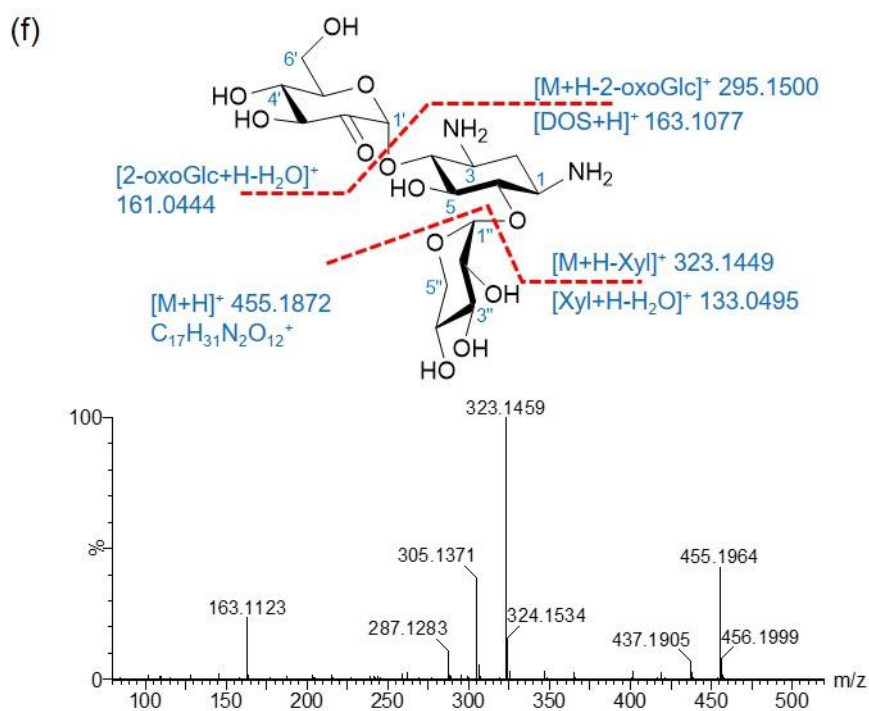

**Supplementary Figure 6. The structural determination of 2'-oxo-JI-20A, 2'-oxo-6'AGA, 2'-oxo-6'AGA2, 2'-oxo-GX2, 2'-oxo-GA, and 2'-oxo-GA2.** MS/MS fragmentation patterns and MS/MS spectra of enzymatically synthesized (a) 2'-oxo-JI-20A, (b) 2'-oxo-6'AGA, (c) 2'-oxo-6'AGA2, (d) 2'-oxo-GX2, (e) 2'-oxo-GA, and (f) 2'-oxo-GA2, respectively. The spectra shown are representative examples of n>5 independent experiments.



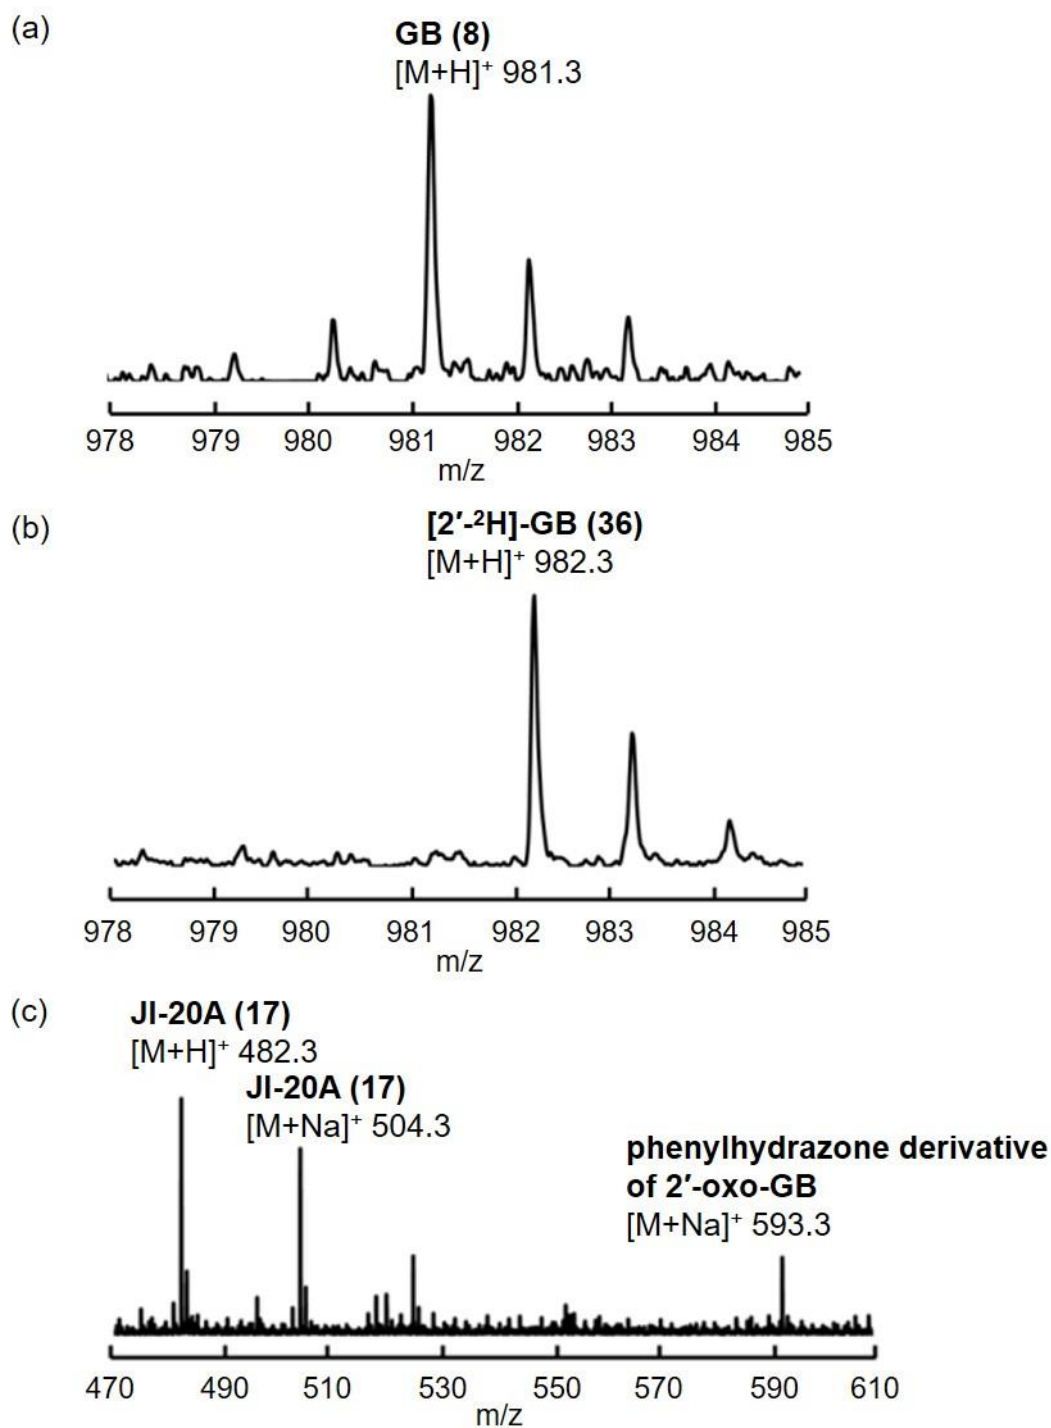

**Supplementary Figure 7. ESI-MS spectra of GenJ reaction with GI-20A (17) in the presence of (a) NaBH<sub>4</sub>, (b) NaBD<sub>4</sub>, and (c) phenylhydrazine.** NaBH<sub>4</sub> reduction: HR-MS C<sub>37</sub>H<sub>44</sub>N<sub>10</sub>O<sub>22</sub> [M+H]<sup>+</sup> calc. 981.2704, obs. 981.2686<sup>[a]</sup>; NaBD<sub>4</sub> reduction: HR-MS C<sub>37</sub>H<sub>43</sub>DN<sub>10</sub>O<sub>22</sub> [M+H]<sup>+</sup> calc. 982.2767, obs. 982.2716<sup>[a]</sup>; phenylhydrazine treatment: HR-MS C<sub>25</sub>H<sub>42</sub>N<sub>6</sub>O<sub>9</sub> [M+Na]<sup>+</sup> calc. 593.2905, obs. 593.2931. The spectra shown are representative examples of n>3 independent experiments. (<sup>[a]</sup> All spectra were about dinitrophenyl (DNP) derivatives.)

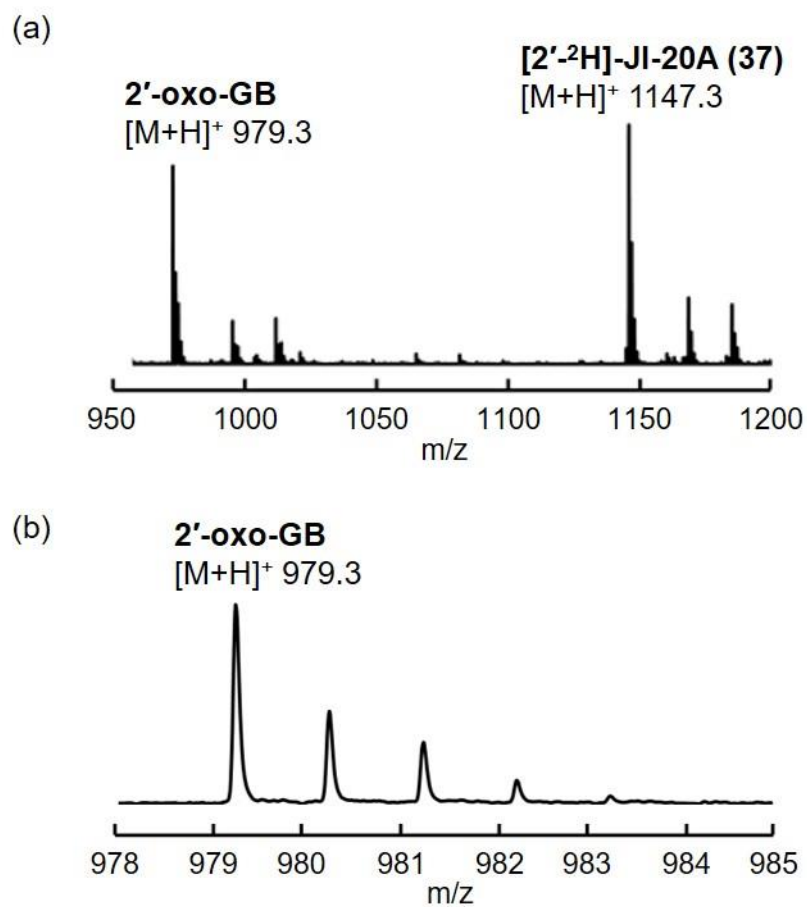

**Supplementary Figure 8. GenJ-GenK2 reaction with [2'-<sup>2</sup>H]-JI-20A (37).** (a) ESI-MS spectra of the GenJ-GenK2 reaction with [2'-<sup>2</sup>H]-JI-20A. (b) Expansion of the product. The spectra shown are representative examples of  $n > 3$  independent experiments. (All spectra were about dinitrophenyl (DNP) derivatives.)

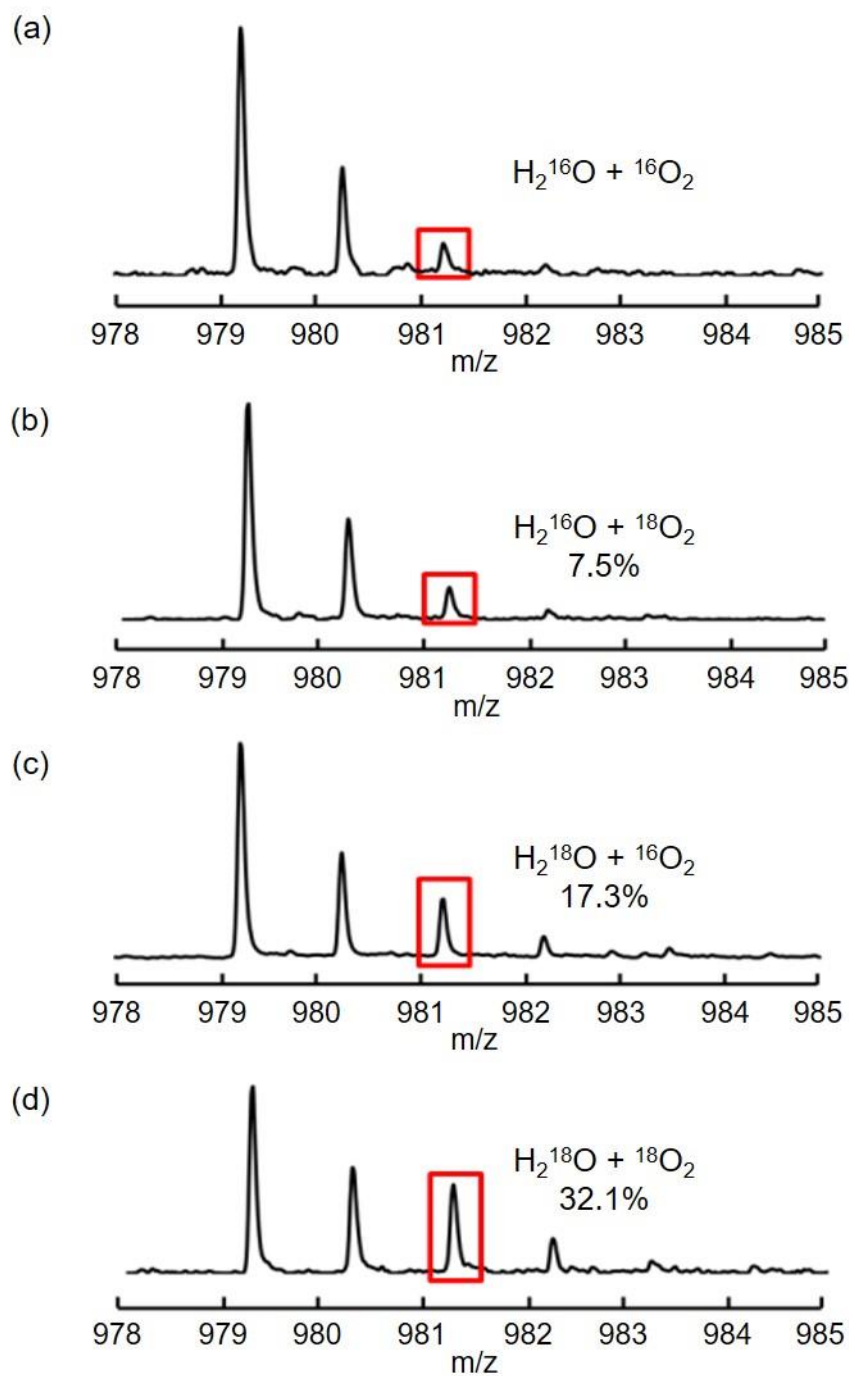

**Supplementary Figure 9. ESI-MS spectra of GenJ reaction with (a)  ${}^{16}\text{O}_2/\text{H}_2^{16}\text{O}$ , (b)  ${}^{18}\text{O}_2/\text{H}_2^{16}\text{O}$ , (c)  ${}^{16}\text{O}_2/\text{H}_2^{18}\text{O}$ , and (d)  ${}^{18}\text{O}_2/\text{H}_2^{18}\text{O}$ . The spectra shown are representative examples of  $n > 3$  independent experiments. (All spectra were about dinitrophenyl (DNP) derivatives.)**

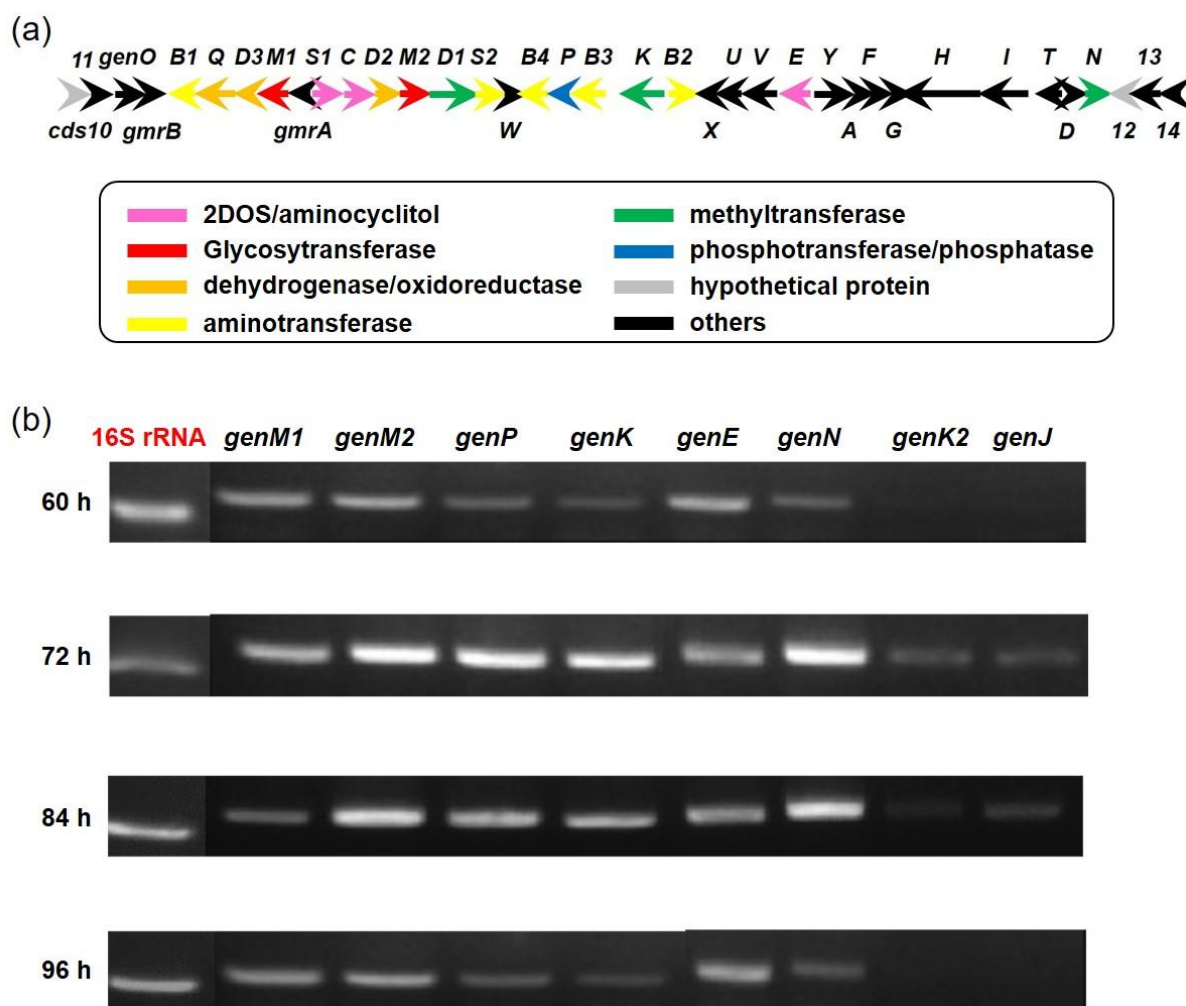

**Supplementary Figure 10. Transcriptional analysis of six gentamicin biosynthetic genes and *genJ-genK2*.** (a) Organization of gentamicin biosynthetic gene cluster from *Micromonospora echinospora* ATCC 15835. (b) Total RNAs were isolated from *M. echinospora* harvested after 60 h, 72 h, 84 h, and 96 h of cultivation. 16S rRNA gene was used as a control. Representative RT-PCR from at least three independent experiments are shown.

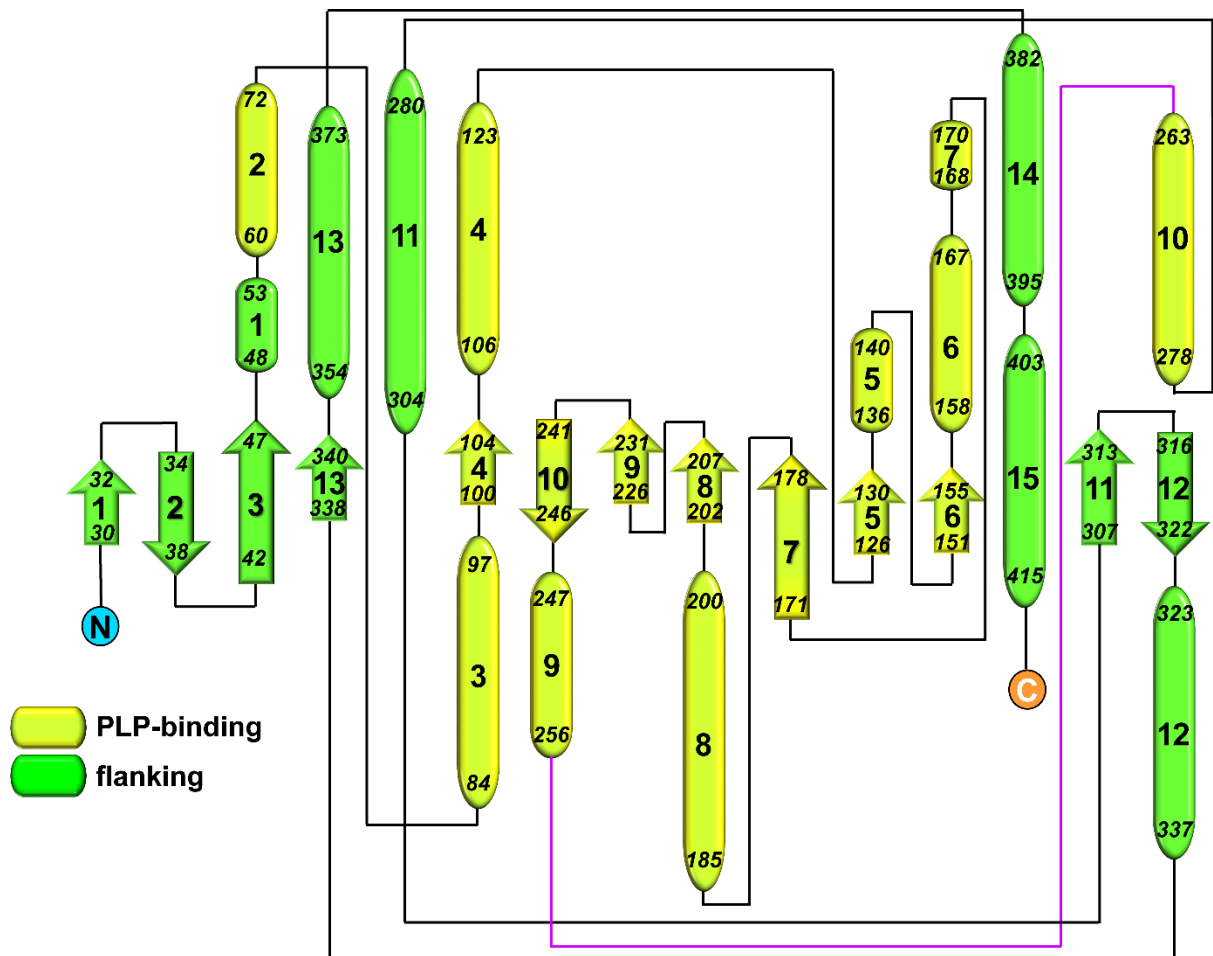

**Supplementary Figure 11. Topological diagram of GenB1.** The flanking domain and PLP-binding domain are shown in dark and light green, respectively. Secondary structure elements are indicated with helices and strands shown as cylinders and arrows, respectively. The connecting loop between  $\alpha 9$  and  $\alpha 10$  participating in the constitution of the active site of the other monomer is colored magenta and N-/C-termini are indicated by circles.

## GenB1-PLP

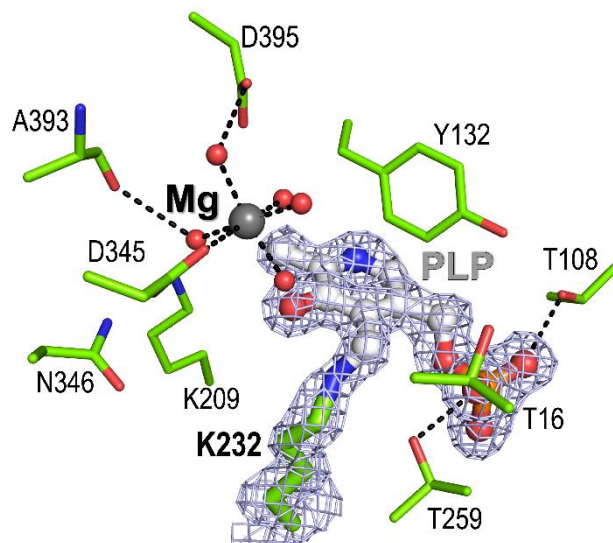

**Supplementary Figure 12. Close-up view of the active site in holo-GenB1.** *2Fo-Fc* omit map (contoured at  $1.0 \sigma$ ) for the internal-aldimine formed between PLP (white) and Lys232 (green) shown in light blue mesh with ball-and-stick models. The electron density map was prepared by simulated annealing refinement of the final model with omission of PLP. Residues constituting the PLP-binding site are shown as green sticks. A magnesium ion and water molecules are indicated by gray and red spheres, respectively. Hydrogen bonds and ionic interactions are indicated by black dashed lines.

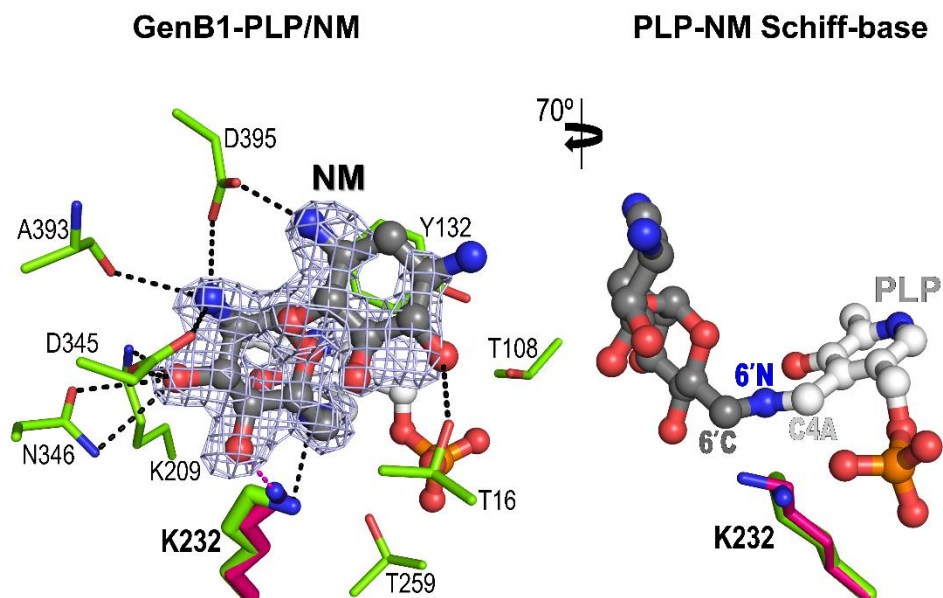

**Supplementary Figure 13. Close-up view of the active site of holo-GenB1 in complex with NM (29).**  $2F_o - F_c$  omit map (contoured at  $1.0 \sigma$ ) for NM shown in light blue mesh with ball-and-stick models (left). Residues interacting with PLP and NM are shown as green sticks. Different conformations of Lys232 in each monomer are emphasized using thicker sticks colored in green and magenta, respectively. The view is rotated  $70^\circ$  for clarity, and the Schiff base intermediate formed between PLP and NM are shown (right). Atoms forming a covalent linkage are marked with labels (carbon (6'C) and nitrogen (6'N) of NM, and carbon (C4A) of PLP). Hydrogen bonds and ionic interactions are indicated by black dashed lines.

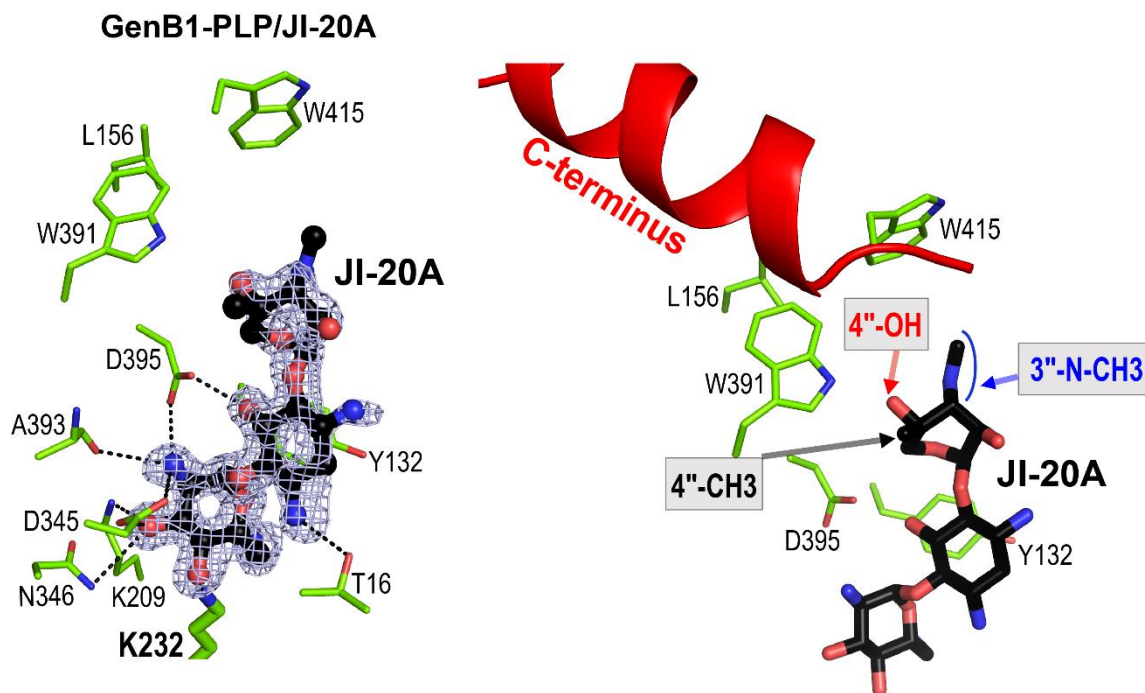

**Supplementary Figure 14. Close-up view of the active site of holo-GenB1 in complex with JI-20A (17).** *2Fo-Fc* omit map (contoured at  $1.0 \sigma$ ) for JI-20A shown in light blue mesh with ball-and-stick models (left). Residues interacting with JI-20A are shown as green sticks. Residues involved in hydrophobic contacts (within 5Å) are presented by sticks. The moieties of ring III are labeled in gray boxes (right). The C-terminus at the methyl pocket is shown as a red ribbon model. For brevity, PLP is not shown in this figure. Hydrogen bonds and ionic interactions are indicated by black dashed lines.



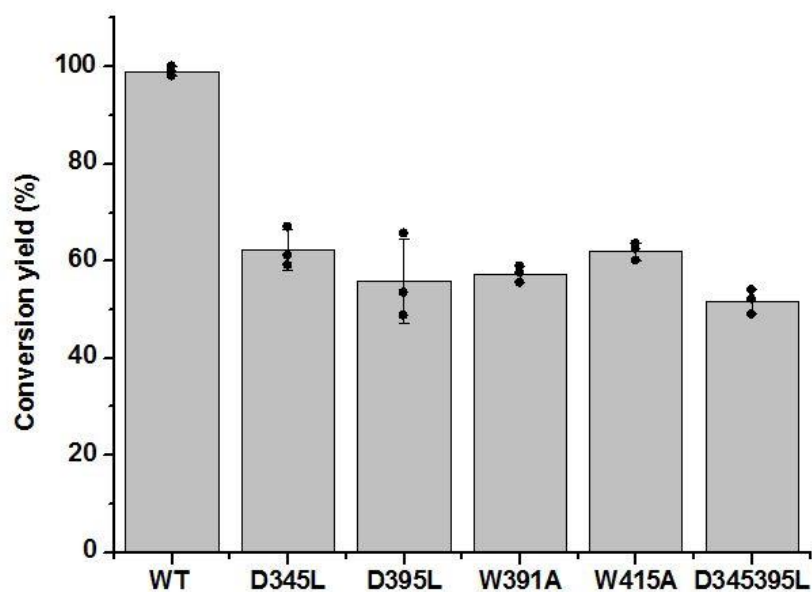

**Supplementary Figure 15. Relative enzymatic activities of GenB1 mutants.** The Y-axis represents the C6'-amination activity toward GX2 (**15**) when the wild-type and the mutant proteins of GenB1 were respectively incubated with GenQ and GX2. Data are expressed as means (n=3)  $\pm$  standard deviations from three independent experiments.

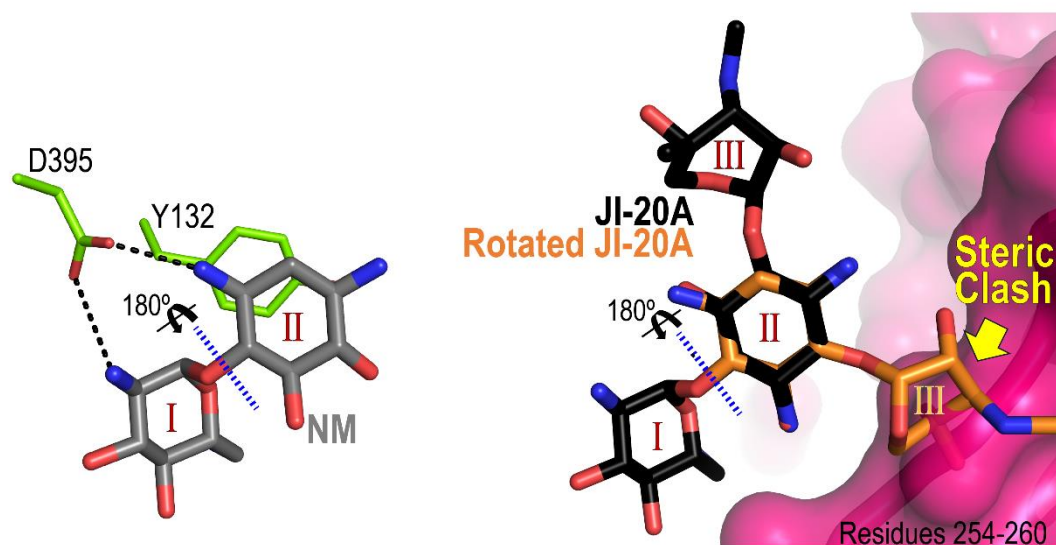

**Supplementary Figure 16. The flipping of ring II in JI-20A (17).** NM (29) (gray) and JI-20A (black) bound to GenB1 are shown as stick models (left and right). The three sugar rings of JI-20A are labeled in red Roman Numerals (I-III). Two residues (Try132 and Asp395) forming the C-H/ $\pi$  stacking and charge interactions with ring II are shown as green sticks. Orange-colored JI-20A in the right is artificially generated by rotating black-colored JI-20A about the linkage between ring I-II to match the ring II of JI-20A with that of NM (left). Steric clash between the rotated JI-20A and the active site is indicated by a yellow arrow. Hydrogen bonds and ionic interactions are indicated by black dashed lines.

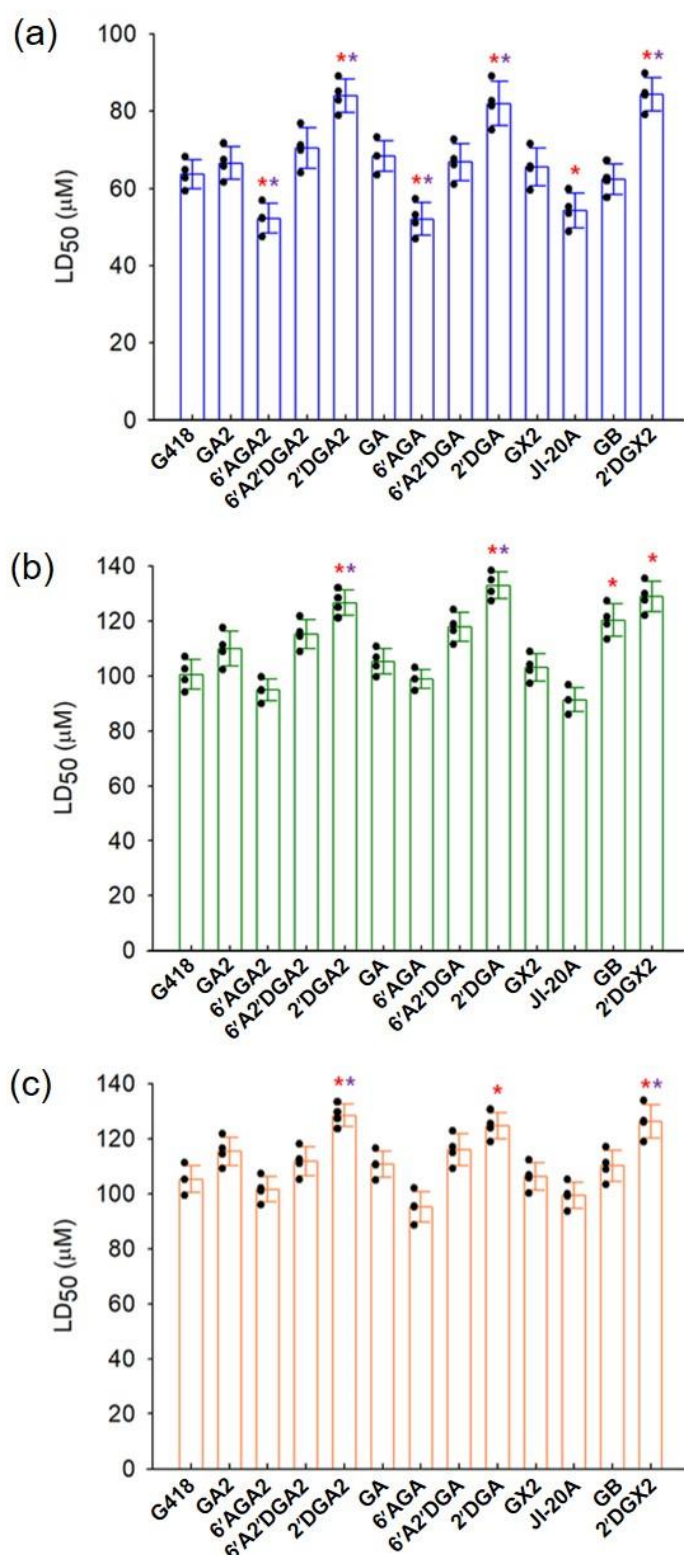

**Supplementary Figure 17. Cytotoxicity of gentamicin intermediates against three different mammalian renal cell lines.** (a) LD<sub>50</sub> (μM) of G418 (**16**), GA2 analogs (GA2 (**13**), 6'AGA2 (**34**), 6'A2'DGA2 (**31**), and 2'DGA2 (**25**)), GA analogs (GA (**14**), 6'AGA (**35**), 6'A2'DGA (**32**), and 2'DGA (**26**)), and GX2 analogs (GX2 (**15**), J1-20A (**17**), GB (**8**), and 2'DGX2 (**27**)) against HEK-293 cells. (b) LD<sub>50</sub> (μM) of G418, GA2 analogs, GA analogs, and GX2 analogs against LLC-PK1 cells. (c) LD<sub>50</sub> (μM) of G418, GA2 analogs, GA analogs, and GX2 analogs

against COS-7 cells. Data were expressed as means ( $n=4$ )  $\pm$  standard deviations and tested for significance using paired or unpaired two-tailed t-test with analysis of variance as appropriate.  $n$  indicates biologically independent experiments. Results with  $P<0.01$  were considered significant. \* $P<0.01$  vs G418; \* $P<0.01$  vs series. The precise p-values are: (a) between 6'AGA2-treated HEK-293 samples and G418-treated samples:  $1e-5$ ; between 2'DGA2-treated samples and G418-treated samples:  $1e-7$ ; between 6'AGA-treated samples and G418-treated samples:  $1e-5$ ; between 2'DGA-treated samples and G418-treated samples:  $2e-7$ ; between JI-20A-treated samples and G418-treated samples:  $1e-4$ ; between 2'DGX2-treated samples and G418-treated samples:  $2e-8$ ; (b) between 2'DGA2-treated LLC-PK1 samples and G418-treated samples:  $2e-7$ ; between 2'DGA-treated samples and G418-treated samples:  $1e-8$ ; between GB-treated samples and G418-treated samples:  $2e-4$ ; between 2'DGX2-treated samples and G418-treated samples:  $2e-8$ ; (c) between 2'DGA2-treated COS-7 samples and G418-treated samples:  $1e-8$ ; between 2'DGA-treated samples and G418-treated samples:  $2e-7$ ; between 2'DGX2-treated samples and G418-treated samples:  $1e-7$ .

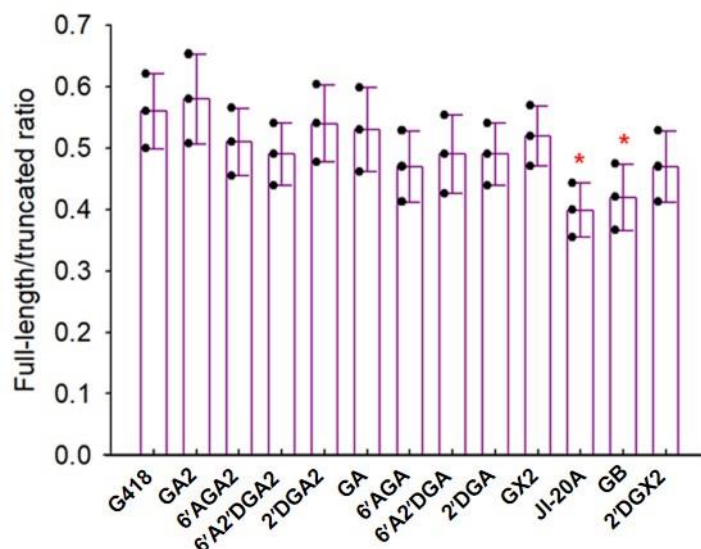

**Supplementary Figure 18. Comparative PTC read-through activity of gentamicin intermediates against primary human cystic fibrosis bronchial epithelial cells.** G418 (**16**), GA2 analogs (GA2 (**13**), 6'AGA2 (**34**), 6'A2'DGA2 (**31**), and 2'DGA2 (**25**)), GA analogs (GA (**14**), 6'AGA (**35**), 6'A2'DGA (**32**), and 2'DGA (**26**)), and GX2 analogs (GX2 (**15**), JI-20A (**17**), GB (**8**), and 2'DGX2 (**27**)) were treated at 25  $\mu$ M. The ratio of full-length to truncated CFTR expressed in the gentamicin intermediates-exposed cells was determined by size exclusion chromatography with MS, described hereinabove. Data were expressed as means ( $n=3$ )  $\pm$  standard deviations and tested for significance using paired or unpaired two-tailed t-test with analysis of variance as appropriate.  $n$  indicates biologically independent experiments. Results with  $P < 0.01$  were considered significant. \* $P < 0.01$  vs G418. Below are specific  $p$ -values between treatments: between JI-20A-treated HEK293 samples and G418-treated samples:  $1e-7$ ; between GB-treated samples and G418-treated samples:  $2e-6$ .

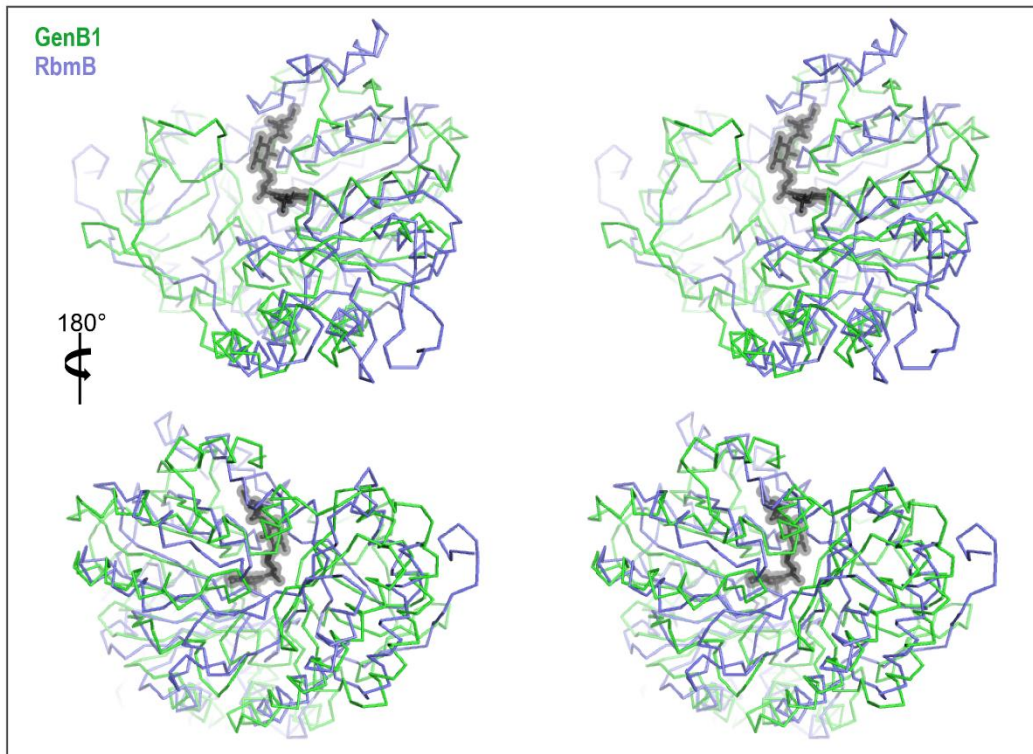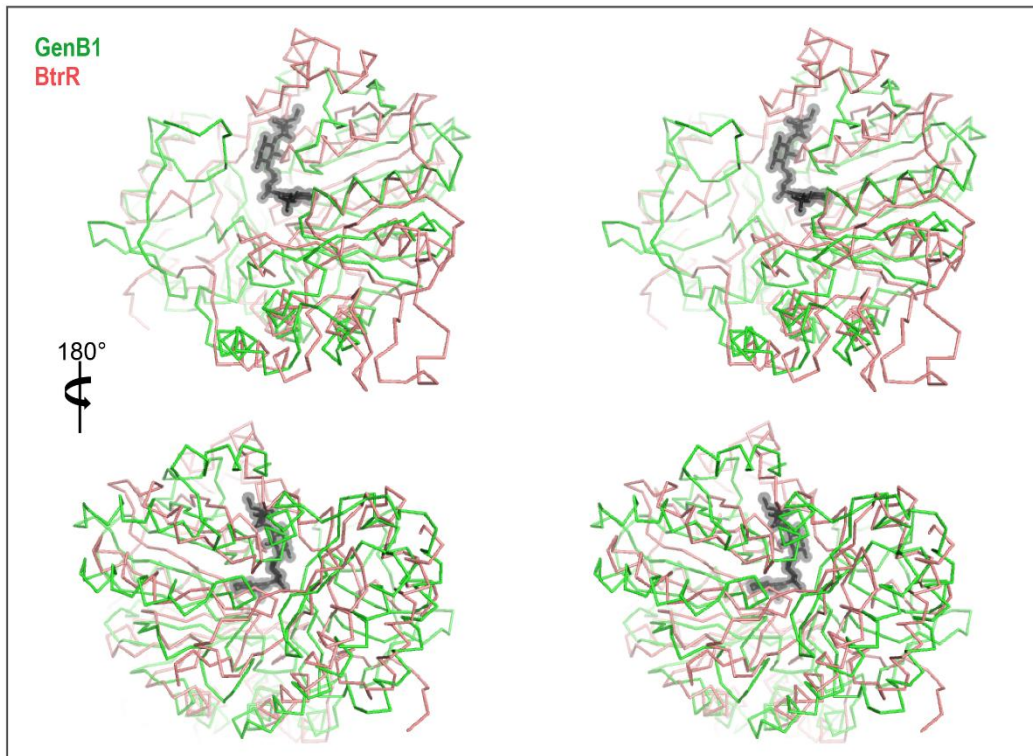

**Supplementary Figure 19. Stereo view of the superimposed C $\alpha$  tracing of GenB1 (green), RbmB (slat: PDB entry 5W70), and BtrR (salmon: PDB entry 5W71). JI-20A (17) bound to the active site of GenB1 is shown as ball and stick models.**

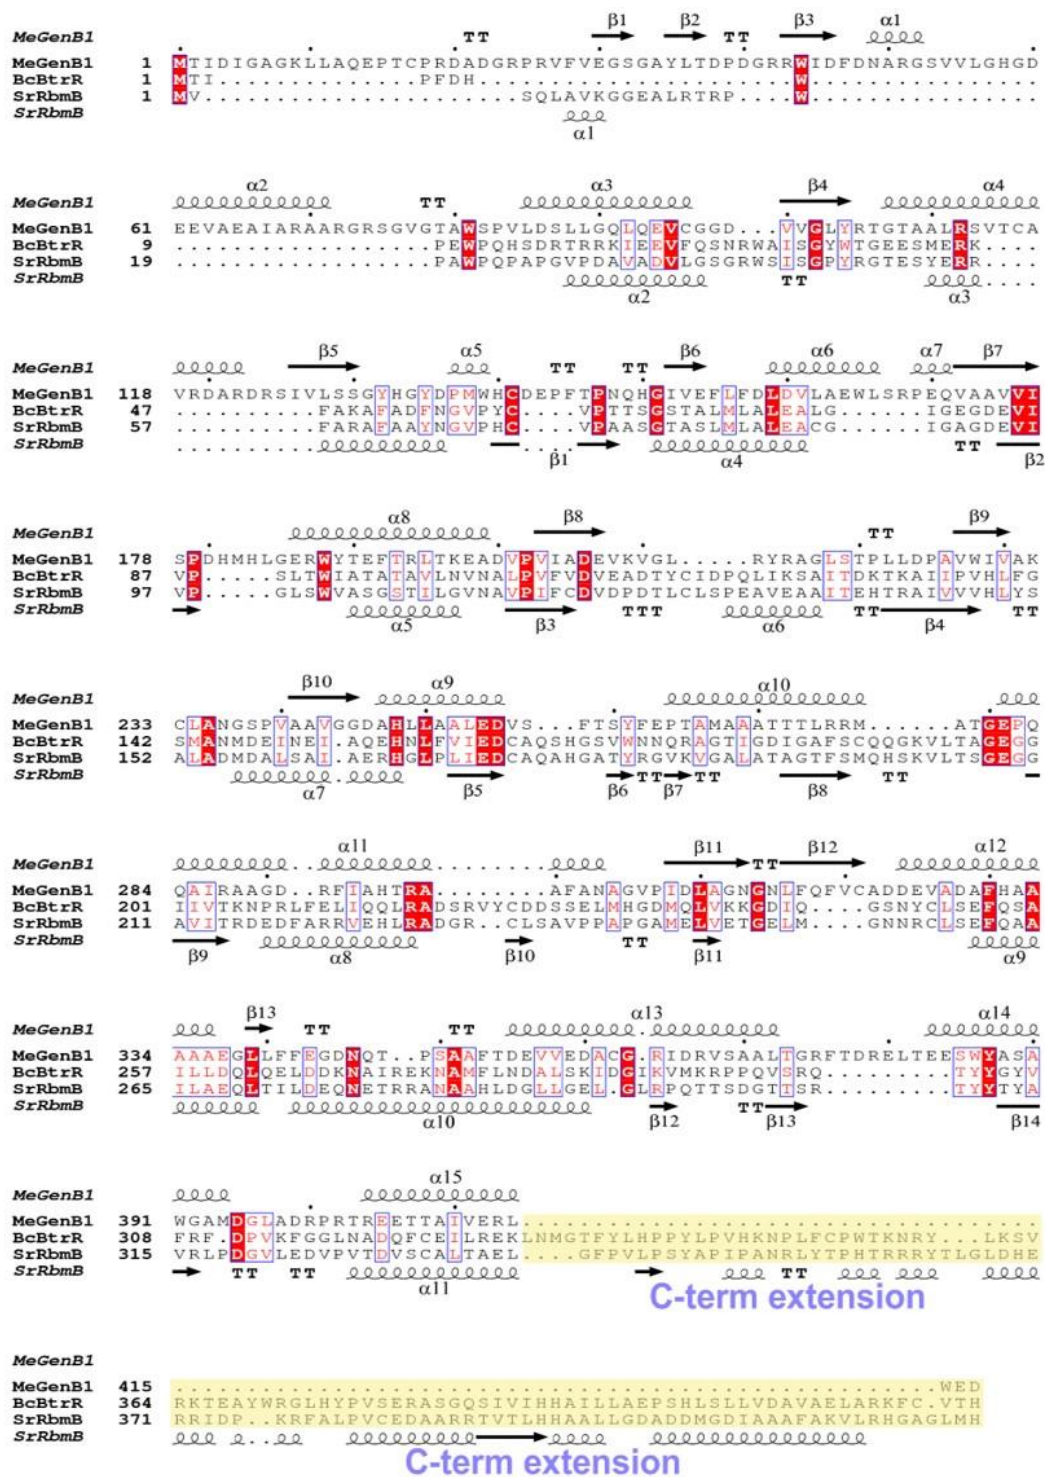

**Supplementary Figure 20. Structure-based sequence alignments of GenB1, BtrR, and RbmB.** Secondary structure assignments in the top and bottom correspond to GenB1 and RbmB, respectively. Identical residues are highlighted with red backgrounds and conserved residues are indicated by red letters in blue boxes. C-terminal extensions observed in BtrR and RbmB are highlighted in yellow backgrounds. Exspasy numbers of the aligned GenB1, BtrR, and RbmB are as follows: GenB1 from *M. echinospora* (Q70KD9), BtrR from *Bacillus circulans* (Q8G8Y2), and RbmB from *Streptomyces ribosidificus* (Q4R0W2). This figure is generated by using ESPript.

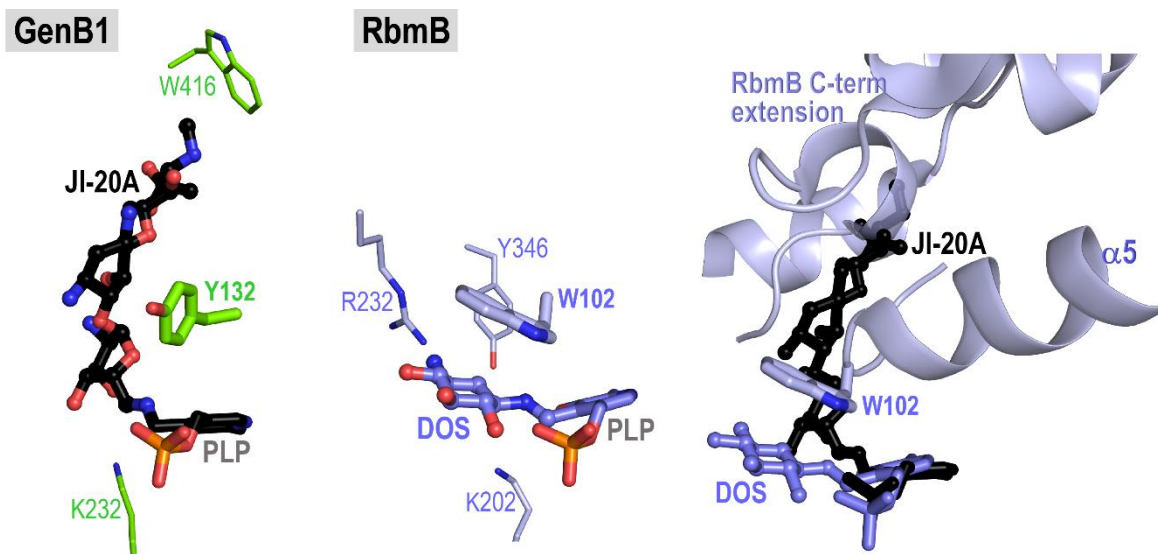

**Supplementary Figure 21. Comparison of active sites between GenB1 and RbmB.** Key residues determining the size and shape of the active site for JI-20A (**17**) (black) and DOS (**10**) (slat) are shown as stick models (left and middle). Residues (Tyr132 in GenB1 and Trp102 in RbmB (PDB entry 5W70)) forming the aromatic platform are emphasized using thicker sticks. Color-coding for PLPs is identical to their linked products. Superposition of the active sites between holo-GenB1 complexed with JI-20A and holo-RbmB complexed with DOS is shown as ribbon and stick model (right). For clarity, GenB1 is not shown. Clash of JI-20A with the active site of RbmB clearly shows that the active site of RbmB cannot accommodate JI-20A. The crystal structures of BtrR and RbmB are superposed with rmsd of 1.89 Å for 358 corresponding C $\alpha$  atoms. Due to this high structural resemblance, BtrR is not presented in this figure for brevity.



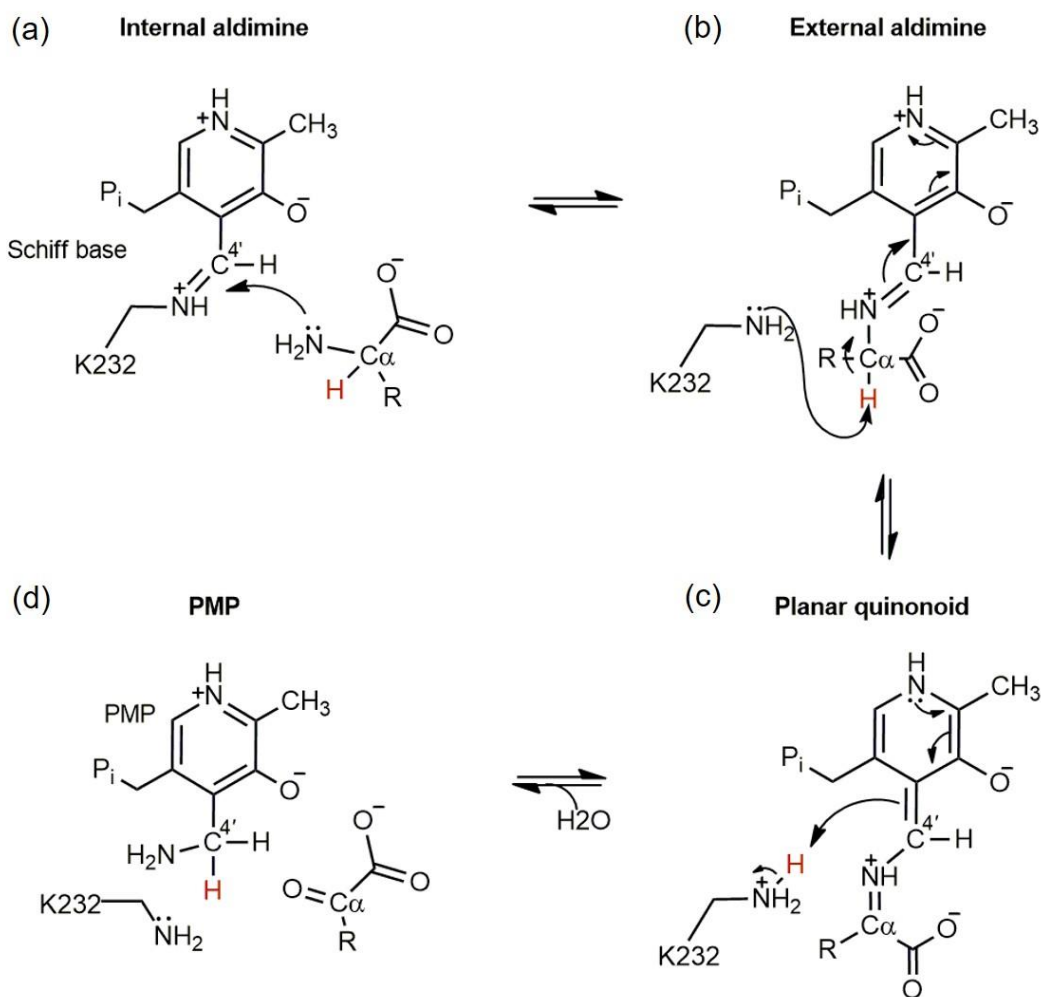

**Supplementary Figure 22. General transamination reaction mechanism.** This figure shows the transfer of an amino group in a donor substrate to PLP to form PMP. (a) At the resting state in transaminases, the C4' atom of PLP is linked to the  $\epsilon$ -amino group of a lysine residue through a Schiff base (internal aldimine). (b) The amino nitrogen atom of the incoming donor substrate replaces the lysine nitrogen atom to form the external aldimine. (c) The displaced lysine residue abstracts a proton from the C $_{\alpha}$  atom in the donor substrate and attaches the proton to the C4' atom of PLP, which changes the location of the Schiff base: the C4'=N Schiff base is changed to the C $_{\alpha}$ =N Schiff base in the external aldimine intermediate to form planar quinonoid. (d) The hydrolysis of the C $_{\alpha}$ =N bond results in the formation of the pyridoxamine phosphate (PMP). The next transfer of the amino group in PMP to an acceptor molecule occurs in the exact reversal way. The carbonyl carbon of the acceptor substrate is attacked by the amino group at the C4' atom of PMP to form the external aldimine. This time the same lysine residue transfers a proton from the C4' atom to the carbonyl carbon of the acceptor substrate to generate a Schiff base between the C4' atom and the amino group. The hydrolysis of this Schiff base gives rise to an aminated product. K232 indicates the lysine residues for proton transfer in GenB1. The C $_{\alpha}$  proton is highlighted in red.

**Supplementary Table 1. Incorporation of  $^{18}\text{O}$  into JI-20A (17) from molecular  $^{18}\text{O}_2$  and  $\text{H}_2^{18}\text{O}$  during the GenJ reaction.** Representative data from n=3 independent experiments are shown.

| <b>Conditions</b>                         | <b><i>m/z</i> 979</b> | <b><i>m/z</i> 980</b> | <b><i>m/z</i> 981</b> | <b><i>m/z</i> 982</b> | <b>Incorporation [%]</b> |
|-------------------------------------------|-----------------------|-----------------------|-----------------------|-----------------------|--------------------------|
| Calc.                                     | 100                   | 45.0                  | 14.4                  | 3.5                   |                          |
| $^{16}\text{O}_2/\text{H}_2^{16}\text{O}$ | 100                   | 42.5                  | 14.0                  | 3.1                   | 0                        |
| $^{18}\text{O}_2/\text{H}_2^{16}\text{O}$ | 100                   | 42.3                  | 21.9                  | 6.8                   | 7.5                      |
| $^{16}\text{O}_2/\text{H}_2^{18}\text{O}$ | 100                   | 51.9                  | 31.7                  | 9.4                   | 17.3                     |
| $^{18}\text{O}_2/\text{H}_2^{18}\text{O}$ | 100                   | 56.5                  | 46.6                  | 18.2                  | 32.1                     |

All spectra were about dinitrophenyl (DNP) derivatives.

**Supplementary Table 2. Crystallographic data and Refinement statistics of GenB1 from *M. echinospora***

|                                                         | GenB1_Se                                      | GenB1_PLP                                     | GenB1_PLP/NM (29)                             | GenB1_PLP/JI-20A (17)                         |
|---------------------------------------------------------|-----------------------------------------------|-----------------------------------------------|-----------------------------------------------|-----------------------------------------------|
| <b>Data collection</b>                                  |                                               |                                               |                                               |                                               |
| X-ray source                                            | PLS_5C                                        | PLS_7A                                        | PLS_5C                                        | PLS_7A                                        |
| Wavelength (Å)                                          | Peak_0.97930                                  | 1.00003                                       | 0.97960                                       | 0.97934                                       |
| Space group                                             | P2 <sub>1</sub> 2 <sub>1</sub> 2 <sub>1</sub> |
| Cell dimensions                                         |                                               |                                               |                                               |                                               |
| <i>a</i> , <i>b</i> , <i>c</i> (Å)                      | 76.27, 87.61, 113.07                          | 77.14, 88.01, 116.14                          | 77.85, 89.16, 117.36                          | 77.77, 88.69, 116.85                          |
| $\alpha$ , $\beta$ , $\gamma$ (°)                       | 90, 90, 90                                    | 90, 90, 90                                    | 90, 90, 90                                    | 90, 90, 90                                    |
| Resolution (Å)                                          | 50-1.80 (1.83-1.80)*                          | 50-1.70 (1.73-1.70)                           | 50-1.76 (1.79-1.76)                           | 50-1.40 (1.42-1.40)                           |
| <i>R</i> <sub>merge</sub> (%)                           | 0.113 (0.239)                                 | 0.055 (0.241)                                 | 0.069 (0.299)                                 | 0.052 (0.325)                                 |
| <i>I</i> / $\sigma$ <i>I</i>                            | 15.9 (8.4)                                    | 34.0 (3.6)                                    | 28.6 (4.2)                                    | 37.1 (3.0)                                    |
| Completeness (%)                                        | 97.9 (91.6)                                   | 97.2 (82.4)                                   | 92.2 (59.0)                                   | 92.0 (60.7)                                   |
| Redundancy                                              | 8.3 (5.1)                                     | 9.4 (4.0)                                     | 9.5 (4.9)                                     | 9.8 (4.5)                                     |
| <b>Refinement</b>                                       |                                               |                                               |                                               |                                               |
| Resolution (Å)                                          |                                               | 33.80-1.70                                    | 32.30-1.76                                    | 27.39-1.40                                    |
| No. reflections                                         |                                               | 84719                                         | 74621                                         | 144352                                        |
| <i>R</i> <sub>work</sub> / <i>R</i> <sub>free</sub> (%) |                                               | 0.160/0.192                                   | 0.183/0.230                                   | 0.172/0.193                                   |
| No. atoms                                               |                                               |                                               |                                               |                                               |
| Protein                                                 |                                               | 6212                                          | 6212                                          | 6212                                          |
| Ligand/ion                                              |                                               | 32                                            | 74                                            | 96                                            |
| Water                                                   |                                               | 684                                           | 626                                           | 967                                           |
| Average <i>B</i> -factor (Å <sup>2</sup> )              |                                               |                                               |                                               |                                               |
| Protein                                                 |                                               | 14.65                                         | 19.79                                         | 17.59                                         |
| Ligand/ion                                              |                                               | 9.70                                          | 21.03                                         | 26.95                                         |
| Water                                                   |                                               | 21.09                                         | 26.04                                         | 28.21                                         |
| R.m.s deviations                                        |                                               |                                               |                                               |                                               |
| Bond lengths (Å)                                        |                                               | 0.012                                         | 0.007                                         | 0.009                                         |
| Bond angles (°)                                         |                                               | 1.13                                          | 0.89                                          | 0.75                                          |

Each dataset was collected from a single crystal. \*Values in parentheses are for highest-resolution shell.

**Supplementary Table 3. Antibacterial activity of gentamicin biosynthetic intermediates.** Representative data from n=3 independent experiments are shown.

| gentamicin intermediates |           | MIC ( $\mu\text{g}/\text{m}\ell$ ) |                                    |                                |                              |                                  |                                    |                                |                              |
|--------------------------|-----------|------------------------------------|------------------------------------|--------------------------------|------------------------------|----------------------------------|------------------------------------|--------------------------------|------------------------------|
|                          |           | Type strain                        |                                    |                                |                              | Clinical isolate                 |                                    |                                |                              |
|                          |           | <i>E. faecalis</i><br>ATCC 29212   | <i>P. aeruginosa</i><br>ATCC 27853 | <i>S. aureus</i><br>ATCC 29213 | <i>E. coli</i><br>ATCC 25922 | <i>E. faecalis</i><br>CCARM 5025 | <i>P. aeruginosa</i><br>CCARM 2002 | <i>S. aureus</i><br>CCARM 3180 | <i>E. coli</i><br>CCARM 1085 |
| gentamicin (QC)          |           | 16                                 | 1–2                                | 1                              | 0.5–1                        | >128                             | >128                               | >128                           | 16                           |
| GA2 analogs              | GA2       | >128                               | >128                               | >128                           | >128                         | >128                             | >128                               | >128                           | >128                         |
|                          | 6'AGA2    | >128                               | >128                               | >128                           | 64                           | >128                             | >128                               | >128                           | >128                         |
|                          | 6'A2'DGA2 | >128                               | >128                               | >128                           | >128                         | >128                             | >128                               | >128                           | >128                         |
|                          | 2'DGA2    | >128                               | >128                               | >128                           | >128                         | >128                             | >128                               | >128                           | >128                         |
| GA analogs               | GA        | >128                               | >128                               | 128                            | 128                          | >128                             | >128                               | >128                           | >128                         |
|                          | 6'AGA     | >128                               | >128                               | 8                              | 8                            | >128                             | >128                               | >128                           | >128                         |
|                          | 6'A2'DGA  | >128                               | >128                               | 16                             | 16                           | >128                             | >128                               | >128                           | >128                         |
|                          | 2'DGA     | >128                               | >128                               | >128                           | >128                         | >128                             | >128                               | >128                           | >128                         |
| GX2 analogs              | GX2       | >128                               | >128                               | 32                             | 32                           | >128                             | >128                               | >128                           | >128                         |
|                          | JI-20A    | >128                               | >128                               | 2                              | 1                            | >128                             | >128                               | >128                           | 16                           |
|                          | GB        | >128                               | >128                               | 4                              | 4                            | >128                             | >128                               | >128                           | 32                           |
|                          | 2'DGX2    | >128                               | >128                               | >128                           | >128                         | >128                             | >128                               | >128                           | >128                         |

MIC: minimal inhibitory concentration. Type strains and clinical isolates were obtained from the American Type Culture Collection (ATCC, USA) and the Culture Collection of Antimicrobial Resistant Microbes (CCARM, Republic of Korea), respectively.

**Supplementary Table 4. List of bacterial strains and plasmids used in this study**

| Strain/Plasmid                          | Relevant characteristics                            | Reference            |
|-----------------------------------------|-----------------------------------------------------|----------------------|
| <i>Escherichia coli</i>                 |                                                     |                      |
| DH5α                                    | Host for general cloning                            | New England Biolabs  |
| BL21(DE3)                               | Host for recombinant protein expression             | Novagen              |
| BL21(DE3)pLysS                          | Host for recombinant protein expression             | Novagen              |
| ArcticExpress(DE3)                      | Host for recombinant protein expression             | Agilent Technologies |
| Rosetta gami <sup>TM2</sup> (DE3)       | Host for recombinant protein expression             | Novagen              |
| ArcticExpress(DE3)/pGENM1               | Strain for GenM1 protein expression                 | This study           |
| BL21(DE3)/pGEND2                        | Strain for GenD2 protein expression                 | This study           |
| BL21(DE3)pLysS/pGENS2                   | Strain for GenS2 protein expression                 | This study           |
| BL21(DE3)/pGENN                         | Strain for GenN protein expression                  | This study           |
| BL21(DE3)pLysS/pGEND1                   | Strain for GenD1 protein expression                 | This study           |
| Rosetta gami <sup>TM2</sup> (DE3)/pGENQ | Strain for GenQ protein expression                  | This study           |
| BL21(DE3)pLysS/pGENB1                   | Strain for GenB1 protein expression                 | This study           |
| BL21(DE3)/pGENJ                         | Strain for GenJ protein expression                  | This study           |
| BL21(DE3)/pGENK2                        | Strain for GenK2 protein expression                 | This study           |
| BL21(DE3)/pGENB1_D345L                  | Strain for Asp345 to Leu345 mutant of GenB1 (D345L) | This study           |
| BL21(DE3)/pGENB1_D395L                  | Strain for Asp395 to Leu395 mutant of GenB1 (D395L) | This study           |

|                                          |                                                                     |                                            |
|------------------------------------------|---------------------------------------------------------------------|--------------------------------------------|
| BL21(DE3)/pGENB1_W391A                   | Strain for Trp391 to Ala391 mutant of GenB1 (W391A)                 | This study                                 |
| BL21(DE3)/pGENB1_W415A                   | Strain for Trp415 to Ala415 mutant of GenB1 (W415A)                 | This study                                 |
| <b><i>Streptomyces venezuelae</i></b>    |                                                                     |                                            |
| ATCC 15439                               | Host for recombinant protein expression                             | Song, J.Y. <i>et al.</i> <sup>1</sup>      |
| <i>S. venezuelae</i> /pGENM2             | Strain for GenM2 protein expression                                 | This study                                 |
| <b><i>Micromonospora echinospora</i></b> |                                                                     |                                            |
| ATCC 15835                               | Gentamicin producing wild-type strain                               | Weinstein, M.J. <i>et al.</i> <sup>2</sup> |
| <b>Plasmid</b>                           |                                                                     |                                            |
| pGEM-Teasy                               | PCR fragment cloning vector                                         | Promega                                    |
| pET15b, pET28a                           | <i>E. coli</i> protein expression vector                            | Novagen                                    |
| pJ404                                    | <i>E. coli</i> protein expression vector                            | DNA2.0                                     |
| pSE34                                    | pWHM3 with <i>Perme</i> * promoter                                  | Smirnova, N. & Reynolds, K.A. <sup>3</sup> |
| pGENM1                                   | N,C-terminal His-tagged GenM1 expression plasmid based on pET28a(+) | This study                                 |
| pGENM2                                   | N,C-terminal His-tagged GenM2 expression plasmid based on pSE34     | This study                                 |
| pGEND2                                   | N-terminal His-tagged GenD2 expression plasmid based on pJ404       | This study                                 |
| pGENS2                                   | N-terminal His-tagged GenS2 expression plasmid based on pET15b(+)   | This study                                 |
| pGENN                                    | N-terminal His-tagged GenN expression plasmid based on pJ404        | This study                                 |
| pGEND1                                   | N-terminal His-tagged GenD1 expression plasmid based on pET15b(+)   | This study                                 |
| pGENQ                                    | N-terminal His-tagged GenQ expression plasmid based on pET28a(+)    | This study                                 |

|              |                                                                                |            |
|--------------|--------------------------------------------------------------------------------|------------|
| pGENB1       | N-terminal His-tagged GenB1 expression plasmid based on pET15b(+)              | This study |
| pGENJ        | N-terminal His-tagged GenJ expression plasmid based on pET28a(+)               | This study |
| pGENK2       | N,C-terminal His-tagged GenK2 expression plasmid based on pET28a(+)            | This study |
| pGENB1_D345L | N-terminal His-tagged GenB1_D345L mutant expression plasmid based on pET15b(+) | This study |
| pGENB1_D395L | N-terminal His-tagged GenB1_D395L mutant expression plasmid based on pET15b(+) | This study |
| pGENB1_W391A | N-terminal His-tagged GenB1_W391A mutant expression plasmid based on pET15b(+) | This study |
| pGENB1_W415A | N-terminal His-tagged GenB1_W415A mutant expression plasmid based on pET15b(+) | This study |

**Supplementary Table 5. List of oligonucleotide primers used in this study**

| <b>Primer</b>  | <b>Oligonucleotide sequences (5' to 3', restriction site underlined)</b> | <b>Description</b>     |
|----------------|--------------------------------------------------------------------------|------------------------|
| GenM2-F        | ATAT <u>CATAT</u> GGGCGGCATGCACGTGTTG                                    | For protein expression |
| GenM2-R        | ATAGA <u>AAGCTT</u> GGACTCCTCCATGAGGGA                                   | For protein expression |
| GenQ-F         | CCCAACCCGGG <u>CATATG</u> CTCATCAGCGTTTC                                 | For protein expression |
| GenQ-R         | TTGCCGGCACCG <u>AATTCG</u> ATGGTCATCGTG                                  | For protein expression |
| GenJ-F         | AATCT <u>CATATG</u> GTGAAGCCGGCCTCC                                      | For protein expression |
| GenJ-R         | CAGGT <u>CTCGAGT</u> CATTGGATCGCG                                        | For protein expression |
| GenK2-F        | GCC <u>CATATG</u> CCTTCGCGATCCAAT                                        | For protein expression |
| GenK2-R        | TAT <u>CTCGAGC</u> GACGACCCGTCG                                          | For protein expression |
| GenM1-RT1      | ATCCGTTCCGAGATCCACT                                                      | For RT-PCR             |
| GenM1-RT2      | CCGATGTAGCCGATGAGC                                                       | For RT-PCR             |
| GenM2-RT1      | AGTACGTCATCCAGCACTCC                                                     | For RT-PCR             |
| GenM2-RT2      | CATGTA <u>CTCCAGGACGACGA</u>                                             | For RT-PCR             |
| GenP-RT1       | GTTGTCGAGGCAGAAGTC                                                       | For RT-PCR             |
| GenP-RT2       | GTTCCCTCCTTCTACGTGAA                                                     | For RT-PCR             |
| GenK-RT1       | ATCATGTCACCGGCGAAG                                                       | For RT-PCR             |
| GenK-RT2       | CCCGTTCTACCCGATCTA                                                       | For RT-PCR             |
| GenE-RT1       | AGGGTTACGAGTCCTGGG                                                       | For RT-PCR             |
| GenE-RT2       | GAACACGACGTCCACCTT                                                       | For RT-PCR             |
| GenN-RT1       | TTGGTACGTCGACCCGCT                                                       | For RT-PCR             |
| GenN-RT2       | CTGCGAGGTGAAGATCTGCA                                                     | For RT-PCR             |
| GenK2-RT1      | ATGCGGTGGTGGATCTGAC                                                      | For RT-PCR             |
| GenK2-RT2      | ACGGTCCGGTACAGGTCA                                                       | For RT-PCR             |
| GenJ-RT1       | CAGGTCATCACTCGATCTTC                                                     | For RT-PCR             |
| GenJ-RT2       | GTTGTGCACGGTGAAGTC                                                       | For RT-PCR             |
| GenB1_D345L_P1 | GTTTTTCGAGGGTCTTAATCAAACCCCGA                                            | For mutagenesis        |
| GenB1_D345L_P2 | TCGGGGTTTGATTAAGACCCTCGAAAAAC                                            | For mutagenesis        |
| GenB1_D395L_P1 | GCGCGTGGGGTGCGATGCTCGGCCTGGCGG                                           | For mutagenesis        |



|                |                                          |                 |
|----------------|------------------------------------------|-----------------|
| GenB1_D395L_P2 | CCGCCAGGCCGAGCATCGCACCCCACGCGC           | For mutagenesis |
| GenB1_W391L_P1 | GCTGGTACGCCAGCGCGGGTGCATGGACG<br>GCC     | For mutagenesis |
| GenB1_W391L_P2 | GGCCGTCCATCGCACCCGCCGCGCTGGCGTACC<br>AGC | For mutagenesis |
| GenB1_W415L_P1 | ATTGTGGAGCGTCTGGCGGAAGATTAACGAG          | For mutagenesis |
| GenB1_W415L_P2 | CTCGAGTTAATCTTCGCCAGACGCTCCACAAT         | For mutagenesis |

## References

1. Song, J.Y. et al. Complete genome sequence of *Streptomyces venezuelae* ATCC 15439, a promising cell factory for production of secondary metabolites. *J. Biotechnol.* **219**, 57–58 (2016).
2. Weinstein, M.J. et al. Gentamicin, a new antibiotic complex from *Micromonospora*. *J. Med. Chem.* **6**, 463–464 (1963).
3. Smirnova, N. & Reynolds, K.A. Engineered fatty acid biosynthesis in *Streptomyces* by altered catalytic function of  $\beta$ -ketoacyl-acyl carrier protein synthase III. *J. Bacteriol.* **183**, 2335–2342 (2001).
